# Supplementary material
Source: PubMed Central journal article supplement (PMC9310518)

Supporting Information

**Diazirines as Potential Molecular Imaging Tags: Probing the Requirements for Efficient and Long-Lived SABRE-Induced Hyperpolarization**

*Kun Shen<sup>+</sup>, Angus W. J. Logan<sup>+</sup>, Johannes F. P. Colell<sup>+</sup>, Junu Bae, Gerardo X. Ortiz, Jr., Thomas Theis, Warren S. Warren,\* Steven J. Malcolmson,\* and Qiu Wang\**

anie\_201704970\_sm\_miscellaneous\_information.pdf

## Supporting Information

### Table of Contents

|                                                  |         |
|--------------------------------------------------|---------|
| I. Synthesis of Diazirine Compounds              | S2–S6   |
| II. Hyperpolarization Details                    | S7–S10  |
| III. References                                  | S10     |
| IV. $^1\text{H}$ and $^{13}\text{C}$ NMR Spectra | S11–S21 |

## I. Synthesis of Diazirine Compounds.

### General Experiment Information.

Unless otherwise noted, reactions were performed without exclusion of air or moisture. All commercially available reagents and solvents were used as received unless otherwise stated. THF was obtained from a DriSolve purification system when necessary. *n*-BuLi was titrated using 1,3-diphenyl-2-propanone tosylhydrazone directly before use. CD<sub>3</sub>I was distilled under N<sub>2</sub> before use. <sup>15</sup>N-labeled hydroxylamine *O*-sulfonic acid (<sup>15</sup>NH<sub>2</sub>OSO<sub>3</sub>H) was synthesized from <sup>15</sup>N-labeled hydroxylamine hydrochloride and chlorosulfonic acid directly before use.<sup>1</sup> Analytical thin-layer chromatography (TLC) was performed using aluminum plates pre-coated with 0.25 mm of 230–400 mesh silica gel impregnated with a fluorescent indicator (254 nm). TLC plates were visualized by exposure to ultraviolet light and/or various stains. Organic solutions were concentrated *in vacuo* using a rotary evaporator. Column chromatography was performed with silica gel (60 Å, standard grade).

**NMR spectra** were recorded on Varian iNova 400 and 500 spectrometers. Proton and carbon chemical shifts (<sup>1</sup>H, <sup>13</sup>C) are quoted in ppm and referenced to SiMe<sub>4</sub> with residual protonated solvent as internal standard. For chloroform-*d*, solvent residuals are 7.26 ppm and 77.00 ppm for <sup>1</sup>H and <sup>13</sup>C respectively. Resonances are described as s (singlet), d (doublet), t (triplet), q (quartet) and combinations thereof. Coupling constants (*J*) are given in Hz and rounded to the nearest 0.1 Hz. For diastereotopic protons, no particular stereochemistry is implied.

**High resolution mass spectra** were recorded by the Mass Spectrometry Facility at the Department of Chemistry, Duke University. High resolution *m/z* values are reported in Daltons, calculated to 4 decimal points from the molecular formula. All found values are within 5 ppm tolerance.

**Infrared spectra** were recorded on a ThermoScientific Nicolet 6700 FTIR equipped with a diamond ATR. Absorption maxima (*ν*<sub>max</sub>) are described as s (strong), m (medium), w (weak), and br (broad) and are reported in wavenumbers (cm<sup>-1</sup>). Only selected peaks are reported.

### 1. Synthesis of 3-(3'-(Methyl-*d*<sub>3</sub>)-3'*H*-diazirin-3'-yl-1',2'-<sup>15</sup>N<sub>2</sub>)propanenitrile (**2**).<sup>1</sup>

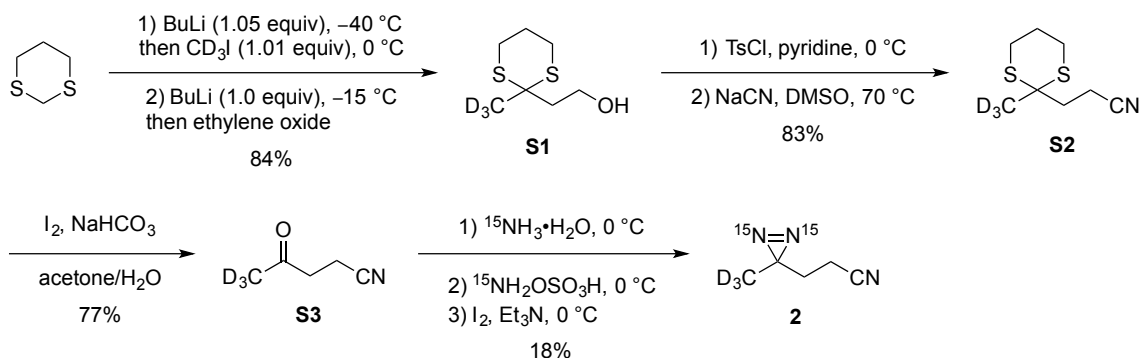

**2-(2'-(Methyl-*d*<sub>3</sub>)-1',3'-dithian-2'-yl)ethan-1-ol (S1).** To a solution of 1,3-dithiane (3.97 g, 33 mmol, 1.0 equiv) in THF (60 mL) under a N<sub>2</sub> atmosphere at -40 °C, was added dropwise *n*-BuLi (13.9 mL, 2.5 M in hexanes, 34.65 mmol, 1.05 equiv) over 10 min. The reaction was slowly warmed to 0 °C, followed by the dropwise addition of CD<sub>3</sub>I over 10 min. The reaction was allowed to stir at 0 °C for 4 h and at room temperature for 10 h, and then was cooled back down to -15 °C. To the reaction mixture, *n*-BuLi (13.2 mL, 33 mmol, 1.0 equiv, 2.5 M in hexanes) was added dropwise over 10 min. After 1 h at room temperature, a solution of ethylene oxide (11 mL, 2.5–3.3 M in THF, 27.5–36.3 mmol, 0.83–1.1 equiv) was added dropwise. The reaction was allowed to stir at room temperature overnight, and then quenched with aqueous HCl (2 M, 20 mL). The mixture was extracted with Et<sub>2</sub>O (100 mL × 2). The organic extracts were combined, washed with saturated aqueous NaHCO<sub>3</sub> (100 mL), brine (50 mL × 2), dried over Na<sub>2</sub>SO<sub>4</sub>, and filtered. The filtrate was concentrated *in vacuo*. The crude residue was purified by flash column chromatography (20% ethyl acetate–hexanes to 50% ethyl acetate–hexanes) to give **S1** as a light yellow liquid (4.97 g, 84%). *R*<sub>f</sub> = 0.22 (25% ethyl acetate–hexanes); <sup>1</sup>H NMR (400 MHz, CDCl<sub>3</sub>): δ 3.84 (t, *J* = 5.9 Hz, 2H), 2.99 (ddd, *J* = 14.7, 10.1, 3.0 Hz, 2H), 2.80 (ddd, *J* = 14.7, 6.6, 3.2 Hz,

2H), 2.29 (s, br, 1H), 2.27 (t,  $J = 5.9$  Hz, 2H), 2.04 (dtt,  $J = 14.0, 6.6, 3.0$  Hz, 1H), 1.90 (dtt,  $J = 14.0, 10.1, 3.2$  Hz, 1H). The values of the  $^1\text{H}$  NMR spectrum are in accordance with reported literature data.<sup>1</sup>

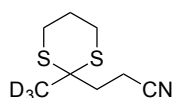

**3-(2'-(Methyl- $d_3$ )-1',3'-dithian-2'-yl)propanenitrile (S2).** To a solution of alcohol **S1** (4.90 g, 27 mmol, 1.0 equiv) in pyridine (25 mL) at 0 °C, was added TsCl (5.40 g, 28.35 mmol, 1.05 equiv) portionwise over 15 min. The reaction was allowed to stir at 0 °C for 2 h then was placed in a -20 °C freezer for 24 h. The reaction was warmed to room temperature and added to a mixture of concentrated aqueous HCl (50 mL) and ice (200 g). The reaction mixture was extracted with Et<sub>2</sub>O (250 mL). The organic layer was successively washed with cold aqueous HCl (0.5 M, 50 mL × 2), cold aqueous NaOH (0.5 M, 50 mL), saturated aqueous NaHCO<sub>3</sub> (25 mL), and brine (25 mL). The solvent was removed *in vacuo*. To the residue was added DMSO (60 mL) followed by NaCN (2.65 g, 54 mmol, 2.0 equiv), and the solution was heated to 70 °C for 4 h. The reaction mixture was cooled down to room temperature, followed by the addition of H<sub>2</sub>O (75 mL), and then was extracted with Et<sub>2</sub>O (60 mL × 3). The organic layers were combined, washed with aqueous NaOH (1 M, 40 mL × 2), brine (40 mL), dried over Na<sub>2</sub>SO<sub>4</sub>, and filtered. The filtrate was concentrated *in vacuo*. The crude residue was purified by flash column chromatography (10% ethyl acetate–hexanes to 25% ethyl acetate–hexanes) to give **S2** as a clear liquid (4.26 g, 83%).  $R_f = 0.44$  (25% ethyl acetate–hexanes);  $^1\text{H}$  NMR (400 MHz, CDCl<sub>3</sub>):  $\delta$  2.89 (ddd,  $J = 14.8, 10.2, 3.0$  Hz, 2H), 2.77 (ddd,  $J = 14.8, 6.4, 3.3$  Hz, 2H), 2.54 (t,  $J = 8.0$  Hz, 2H), 2.33 (t,  $J = 8.0$  Hz, 2H), 2.03 (dtt,  $J = 14.0, 6.4, 3.0$  Hz, 1H), 1.89 (dtt,  $J = 14.0, 10.2, 3.3$  Hz, 1H). The values of the  $^1\text{H}$  NMR spectrum are in accordance with reported literature data.<sup>1</sup>

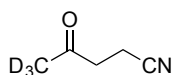

**4-Oxopentanenitrile-5,5,5- $d_3$  (S3).** To a solution of dithiane **S2** (4.00 g, 21 mmol, 1.0 equiv) in acetone/H<sub>2</sub>O (75 mL/7.5 mL) at 0 °C was added solid NaHCO<sub>3</sub> (12.35 g, 147 mmol, 7 equiv) followed by I<sub>2</sub> (15.99 g, 63 mmol, 3 equiv). The reaction was allowed to stir at 0 °C for 2 h and then warmed to room temperature, followed by the addition of an extra amount of I<sub>2</sub> (5.33 g, 21 mmol, 1.0 equiv). The reaction was allowed to stir at room temperature for 1 h and quenched by the addition of aqueous Na<sub>2</sub>S<sub>2</sub>O<sub>3</sub> (10% w/v, 250 mL). The resulting solution was extracted with EtOAc (200 mL × 4). The combined organic extracts were washed with an aqueous Na<sub>2</sub>S<sub>2</sub>O<sub>3</sub> (10% w/v, 40 mL), an aqueous NaOH (1 M, 80 mL), brine (100 mL), dried over Na<sub>2</sub>SO<sub>4</sub>, and filtered. The filtrate was concentrated *in vacuo*. The crude residue was purified by flash column chromatography (10% ethyl acetate–hexanes to 50% ethyl acetate–hexanes) to give ketone **S3** as a light yellow liquid (1.62 g, 77%).  $R_f = 0.14$  (25% ethyl acetate–hexanes);  $^1\text{H}$  NMR (400 MHz, CDCl<sub>3</sub>):  $\delta$  2.64 (t,  $J = 7.2$  Hz, 2H), 2.33 (t,  $J = 7.2$  Hz, 2H). The values of the  $^1\text{H}$  NMR spectrum are in accordance with reported literature data.<sup>1</sup>

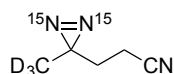

**3-(3'-(Methyl- $d_3$ )-3' $H$ -diazirin-3'-yl-1',2'- $^{15}\text{N}_2$ )propanenitrile (2).** To a solution of ketone **S3** (1.50 g, 15 mmol, 1.0 equiv) in aqueous  $^{15}\text{NH}_4\text{OH}$  (14 M, 2.7 mL, 37.5 mmol, 2.5 equiv) at 0 °C, was added dropwise a solution of  $^{15}\text{NH}_2\text{OSO}_3\text{H}$  (1.71 g, 15 mmol, 1.0 equiv) in MeOH (9 mL) over 5 min. The reaction was stirred at 0 °C for 40 min and then at room temperature for 1 h. The reaction was poured onto MeOH (60 mL), and filtered. The solvent was removed *in vacuo* (~20 mL residue). The concentrated solution was cooled down to 0 °C and Et<sub>3</sub>N (1 mL) was added, followed by the addition of I<sub>2</sub> portion wise (until a brown color persisted). The reaction was allowed to stir at 0 °C for an additional 40 min and then at room temperature for 30 min, and was quenched by the addition of brine (50 mL). The mixture was extracted with Et<sub>2</sub>O (25 mL × 2). The combined organic extracts were washed with aqueous Na<sub>2</sub>S<sub>2</sub>O<sub>3</sub> (10% w/v, 25 mL × 2), aqueous HCl (0.25 M, 10 mL × 2), saturated aqueous NaHCO<sub>3</sub> (10 mL × 2), brine (10 mL), dried over Na<sub>2</sub>SO<sub>4</sub>, and filtered. The filtrate was concentrated *in vacuo*. The crude residue was purified by flash column chromatography (10% ethyl acetate–hexanes to 50% ethyl acetate–hexanes) to give diazirin **2** as a clear liquid (0.303 g, 18%).  $R_f = 0.50$  (25% ethyl acetate–hexanes);  $^1\text{H}$  NMR (400 MHz, CDCl<sub>3</sub>):  $\delta$  2.22 (t,  $J = 7.5$  Hz, 2H), 1.73 (t,  $J = 7.5$  Hz, 2H). The values of the  $^1\text{H}$  NMR spectrum are in accordance with reported literature data.<sup>1</sup>

## 2. Synthesis of 3-(3'-(Methyl- $d_3$ )-3' $H$ -diazirin-3'-yl-1',2'- $^{15}\text{N}_2$ )propanoic acid (3).<sup>2,3</sup>

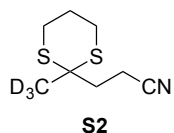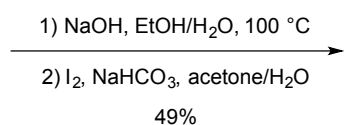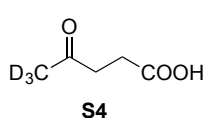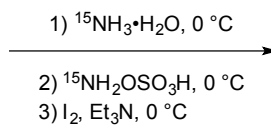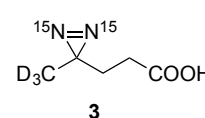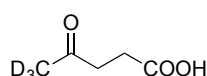

**4-Oxopentanoic-5,5,5- $d_3$  acid (S4).** A mixture of **S2** (1.9 g, 10 mmol, 1 equiv), EtOH (25 mL), and an aqueous NaOH solution (8 g in 10 mL of H<sub>2</sub>O) was allowed to stir at 80 °C overnight. Then the mixture was concentrated *in vacuo* and the residue was dissolved in water. The aqueous solution was washed with Et<sub>2</sub>O, acidified with concentrated HCl, and then extracted with Et<sub>2</sub>O. The organic layers were combined and the solvent was removed *in vacuo*. The residue was dissolved in acetone/H<sub>2</sub>O (25 mL/2.5 mL). Then NaHCO<sub>3</sub> (5.88 g, 70 mmol, 7 equiv) and I<sub>2</sub> (10.16 g, 40 mmol, 4 equiv) were added. The resulting mixture was stirred at room temperature for 2 h, and then acidified with aqueous HCl (2 M). The resulting solution was extracted with EtOAc (20 mL × 3). The organic layers were combined, washed with saturated aqueous Na<sub>2</sub>S<sub>2</sub>O<sub>3</sub> (20 mL) and brine (20

mL), dried over Na<sub>2</sub>SO<sub>4</sub>, and filtered. The filtrate was concentrated *in vacuo*. The crude residue was purified by flash column chromatography (20% ethyl acetate–hexanes to 50% ethyl acetate–hexanes) to give **S4** as a colorless liquid (663.9 mg, 49%). *R<sub>f</sub>* = 0.10 (20% ethyl acetate–hexanes); <sup>1</sup>H NMR (400 MHz, CDCl<sub>3</sub>): δ 10.5 (s, br, 1 H), 2.74 (t, *J* = 6.0 Hz, 2H), 2.61 (t, *J* = 6.0 Hz, 2H); <sup>13</sup>C NMR (100 MHz, CDCl<sub>3</sub>): δ 206.7, 178.6, 37.6, 27.7, one carbon (CD<sub>3</sub>) missing due to low signal-to-noise; FTIR (neat), cm<sup>-1</sup> 2920, 1701, 1398, 1361, 1237, 1159; HRMS-ESI (*m/z*) calcd. for C<sub>5</sub>H<sub>4</sub>D<sub>3</sub>O<sub>3</sub> ([*M*-H]<sup>-</sup>): 118.0589; found: 118.0589.

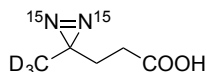

**3-(3'-(Methyl-*d*<sub>3</sub>)-3'*H*-diazirin-3'-yl-1',2'-<sup>15</sup>N<sub>2</sub>)propanoic acid (3).** To a solution of **S4** (238 mg, 2 mmol, 1.0 equiv) in aqueous <sup>15</sup>NH<sub>4</sub>OH (14 M, 0.44 mL, 6 mmol, 3 equiv) at 0 °C, was added dropwise a solution of <sup>15</sup>NH<sub>2</sub>OSO<sub>3</sub>H (226 mg, 2 mmol, 1.0 equiv) in MeOH (4 mL). The reaction was allowed to stir at 0 °C for 40 min and then at room temperature for 4 h. The solid was filtered off. The solvent was removed *in vacuo*. The concentrated solution was cooled down to 0 °C and MeOH/Et<sub>3</sub>N (4 mL/1 mL) was added, followed by the addition of I<sub>2</sub> portion wise (until a brown color persisted). The reaction was stirred for an additional 40 min at 0 °C, then at room temperature for 30 min, and was quenched by the addition of brine (20 mL). The mixture was washed with Et<sub>2</sub>O (20 mL). The aqueous layer were acidified to pH = 1, extracted with Et<sub>2</sub>O (30 mL × 3). The organic layers were combined, washed with saturated aqueous Na<sub>2</sub>S<sub>2</sub>O<sub>3</sub> (20 mL × 2) and brine (20 mL). The organic layer was dried over Na<sub>2</sub>SO<sub>4</sub>, and filtered. The filtrate was concentrated *in vacuo*. The crude residue was purified by flash column chromatography (50% diethyl ether–pentane) to give **3** as a yellow liquid (81.9 mg, 31%). *R<sub>f</sub>* = 0.30 (20% ethyl acetate–hexanes); <sup>1</sup>H NMR (500 MHz, CDCl<sub>3</sub>): δ 2.23 (t, *J* = 7.5 Hz, 2H), 1.72 (t, *J* = 7.5 Hz, 2H); <sup>13</sup>C NMR (126 MHz, CDCl<sub>3</sub>): δ 177.6, 29.2, 28.3, two carbon (CD<sub>3</sub> and diazirine carbon) missing due to low signal-to-noise; FTIR (neat), cm<sup>-1</sup> 2924, 1709, 1415, 1289, 1217, 932; HRMS-ESI (*m/z*) calcd. for C<sub>5</sub>H<sub>4</sub>D<sub>3</sub><sup>15</sup>N<sub>2</sub>O<sub>2</sub> ([*M*-H]<sup>-</sup>): 132.0642; found: 132.0642.

### 3. Synthesis of 3-(2'-((*tert*-butyldimethylsilyloxy)ethyl)-3-(methyl-*d*<sub>3</sub>)-3H-diazirine-1,2-<sup>15</sup>N<sub>2</sub>) (4).

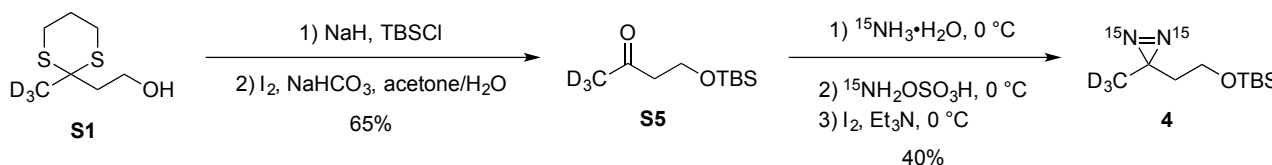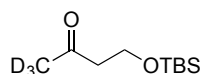

**4-(*tert*-Butyldimethylsilyloxy)butan-2-one-1,1,1-*d*<sub>3</sub> (S5).** To a suspension of NaH (336 mg, 60% dispersion in mineral oil, 8.4 mmol, 1.2 equiv) in THF (30 mL) was added **S1** (1.26 g, 7.0 mmol, 1 equiv) dropwise. The resulting mixture was allowed to stir at room temperature for 1 h. Then TBSCl (1.30 g, 8.4 mmol, 1.2 equiv) was added. After stirring for additional 3 h at room temperature, the mixture was partitioned between Et<sub>2</sub>O (30 mL) and 10% aqueous solution of potassium carbonate (30 mL). The organic layer was separated and the aqueous layer was extracted with Et<sub>2</sub>O (30 mL). The organic layers were combined and the solvent was removed *in vacuo*. The residue was dissolved in acetone/H<sub>2</sub>O (25 mL/2.5 mL). Then NaHCO<sub>3</sub> (4.1 g, 49 mmol, 7 equiv) and I<sub>2</sub> (7.1 g, 28 mmol, 4 equiv) were added. The resulting mixture was stirred at room temperature for 2 h. The reaction was quenched with saturated aqueous Na<sub>2</sub>S<sub>2</sub>O<sub>3</sub> (20 mL). The resulting solution was extracted with EtOAc (20 mL × 3). The organic layers were combined, washed with brine (20 mL), dried over Na<sub>2</sub>SO<sub>4</sub>, and filtered. The filtrate was concentrated *in vacuo*. The crude residue was purified by flash column chromatography (hexanes to 5% ethyl acetate–hexanes) to give **S5** as a colorless liquid (932.6 mg, 65%). *R<sub>f</sub>* = 0.70 (20% ethyl acetate–hexanes); <sup>1</sup>H NMR (500 MHz, CDCl<sub>3</sub>): δ 3.85 (t, *J* = 6.5 Hz, 2H), 2.58 (t, *J* = 6.5 Hz, 2H), 0.84 (s, 9 H), 0.01 (s, 6H); <sup>13</sup>C NMR (126 MHz, CDCl<sub>3</sub>): δ 208.0, 58.8, 46.4, 25.8, 18.1, -5.5, one carbon (CD<sub>3</sub>) missing due to low signal-to-noise; FTIR (neat), cm<sup>-1</sup> 2954, 2928, 2884, 2856, 1711, 1252, 1096, 830, 774; HRMS-ESI (*m/z*) calcd. for C<sub>10</sub>H<sub>20</sub>D<sub>3</sub>O<sub>2</sub>Si ([*M*+H]<sup>+</sup>): 206.1650; found: 206.1650.

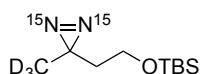

**3-(2'-((*tert*-Butyldimethylsilyloxy)ethyl)-3-(methyl-*d*<sub>3</sub>)-3H-diazirine-1,2-<sup>15</sup>N<sub>2</sub> (4).** To a solution of **S5** (615 mg, 3 mmol, 1.0 equiv) in aqueous <sup>15</sup>NH<sub>4</sub>OH (14 M, 0.66 mL, 9 mmol, 3 equiv) at 0 °C, was added dropwise a solution of <sup>15</sup>NH<sub>2</sub>OSO<sub>3</sub>H (339 mg, 3 mmol, 1.0 equiv) in MeOH (6 mL). The reaction was allowed to stir at 0 °C for 40 min and then at room temperature for 4 h. The solid was filtered off. The solvent was removed *in vacuo*. To the concentrated solution, was added at 0 °C MeOH/Et<sub>3</sub>N (12 mL/3 mL) followed by the addition of I<sub>2</sub> portion wise (until a brown color persisted). The reaction mixture was allowed to stir at 0 °C for 40 min and then at room temperature for 30 min, and was next quenched by the addition of brine (20 mL). The mixture was extracted with Et<sub>2</sub>O (20 mL × 2). The organic layers were combined, washed with saturated aqueous Na<sub>2</sub>S<sub>2</sub>O<sub>3</sub> (20 mL × 2) and brine (20 mL). The organic layer was dried over Na<sub>2</sub>SO<sub>4</sub>, and filtered. The filtrate was concentrated *in vacuo*. The crude residue was purified by flash column chromatography (5% diethyl ether–pentane) to give **4** as a yellow liquid (263.4 mg, 40%). *R<sub>f</sub>* = 0.80 (10% ethyl acetate–hexanes); <sup>1</sup>H NMR (500 MHz, CDCl<sub>3</sub>): δ 3.54 (t, *J* = 6.0 Hz, 2H), 1.50 (t, *J* = 6.0 Hz, 2H), 0.90 (s, 9H), 0.06 (s, 6H); <sup>13</sup>C NMR (126 MHz, CDCl<sub>3</sub>): δ 58.1, 37.6, 25.8, 18.2, -5.4, two carbon (CD<sub>3</sub> and diazirine carbon) missing due to low signal-to-noise; FTIR (neat), cm<sup>-1</sup> 2953, 2928, 2856, 1254, 1100, 833, 744; HRMS-ESI (*m/z*) calcd. for C<sub>10</sub>H<sub>20</sub>D<sub>3</sub><sup>15</sup>N<sub>2</sub>O<sub>2</sub>Si ([*M*+H]<sup>+</sup>): 220.1709; Satisfactory HRMS data could not be obtained.

#### 4. Synthesis of 3-(3'-methyl-3'-H-diazirin-3'-yl-1',2'-<sup>15</sup>N<sub>2</sub>)propanenitrile (*d*<sub>0</sub>-2).

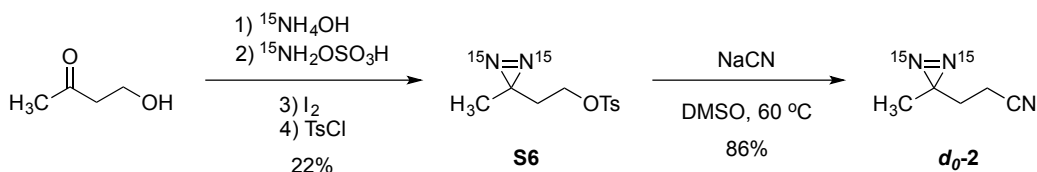

**2'-(3''-Methyl-3''*H*-diazirin-3''-yl-1'',2''-<sup>15</sup>N<sub>2</sub>)ethyl-4-methylbenzenesulfonate (S6).** To a solution of 4-hydroxybutan-2-one (0.44 g, 5 mmol) in aqueous <sup>15</sup>NH<sub>4</sub>OH (14 M, 1.07 mL, 15 mmol, 3 equiv) was added dropwise a solution of <sup>15</sup>NH<sub>2</sub>OSO<sub>3</sub>H (0.57 g, 5 mmol, 1.0 equiv) in MeOH (10 mL). The reaction was stirred at room temperature for 5 h. The solid was filtered off. The solvent was removed *in vacuo*. The concentrated solution was cooled down to 0 °C and MeOH/Et<sub>3</sub>N (10 mL/4 mL) was added, followed by the addition of I<sub>2</sub> portion wise (until a brown color persisted). The reaction was allowed to stir at room temperature for 1 h, and was quenched by the addition of brine (40 mL). The mixture was extracted with Et<sub>2</sub>O (50 mL × 3). The organic layers were combined, washed with saturated aqueous Na<sub>2</sub>S<sub>2</sub>O<sub>3</sub> (20 mL) and brine (20 mL). The organic layer was dried over Na<sub>2</sub>SO<sub>4</sub>, and filtered. The filtrate was concentrated *in vacuo*. To the crude residue was added pyridine (4 mL) and TsCl (1.15 g, 6 mmol, 1.2 equiv). The reaction mixture was allowed to stir overnight at room temperature and then was poured onto ice (60 g). The mixture was diluted with concentrated HCl (10 mL) and extracted with Et<sub>2</sub>O (50 × 3 mL). The organic layer was washed with saturated aqueous solution of NaHCO<sub>3</sub> (25 mL) and brine (25 mL). The organic layer was dried over Na<sub>2</sub>SO<sub>4</sub>, and filtered. The crude residue was purified by flash silica column chromatography (10% ethyl acetate–hexanes) to give **S6** as a yellow liquid (282.5 mg, 22% yield). *R*<sub>f</sub> = 0.53 (20% ethyl acetate–hexanes); <sup>1</sup>H NMR (500 MHz, CDCl<sub>3</sub>): δ 7.74 (d, *J* = 8.0 Hz, 2H), 7.31 (d, *J* = 8.0 Hz, 2H), 3.90 (t, *J* = 6.0 Hz, 2H), 2.39 (s, 3H), 1.61 (t, *J* = 6.0 Hz, 2H), 0.93 (s, 3H); <sup>13</sup>C NMR (126 MHz, CDCl<sub>3</sub>): δ 144.8, 132.3, 129.7, 127.6, 65.0, 33.8, 23.1 (t, *J* = 9.0 Hz), 21.3, 19.4. FTIR (neat), cm<sup>-1</sup> 1354, 1188, 1173, 967, 899, 814, 750, 660, 552; HRMS-ESI (m/z) calcd. for C<sub>11</sub>H<sub>14</sub><sup>15</sup>N<sub>2</sub>O<sub>3</sub>S ([M+Na]<sup>+</sup>): 279.0561; found: 279.0567.

**3-(3'-Methyl-3'*H*-diazirin-3'-yl-1',2'-<sup>15</sup>N<sub>2</sub>)propanenitrile (*d*<sub>0</sub>-2).** To a solution of **S6** (52.4 mg, 0.2 mmol) in DMSO (1 mL) was added NaCN (11.8 mg, 0.24 mmol). The resulting mixture was allowed to stir at 60 °C for 5 h and then was quenched by the addition of H<sub>2</sub>O (3 mL). The mixture was extracted with Et<sub>2</sub>O (4 mL × 3). The organic layers were combined, washed with brine (4 mL), dried over Na<sub>2</sub>SO<sub>4</sub>, and filtered through a pale of silica gel. The filtrate was concentrated *in vacuo* to give **d**<sub>0</sub>-2 as a yellow liquid (18.9 mg, 86% yield). *R*<sub>f</sub> = 0.50 (25% ethyl acetate–hexanes); <sup>1</sup>H NMR (500 MHz, CDCl<sub>3</sub>): δ 2.22 (t, *J* = 7.5 Hz, 2H), 1.74 (t, *J* = 7.5 Hz, 2H), 1.10 (s, 3H); <sup>13</sup>C NMR (126 MHz, CDCl<sub>3</sub>): δ 118.4, 30.8, 24.4 (t, *J* = 9.0 Hz), 19.3, 12.1. FTIR (neat), cm<sup>-1</sup> 2928, 2250, 1541, 1446, 1426, 913, 732; Satisfactory HRMS data could not be obtained.

#### 5. Synthesis of 3-(3'-(methyl-*d*<sub>3</sub>)-3'*H*-diazirin-3'-yl-1',2'-<sup>15</sup>N<sub>2</sub>)propanenitrile-3,3-*d*<sub>2</sub> (*d*<sub>5</sub>-2).

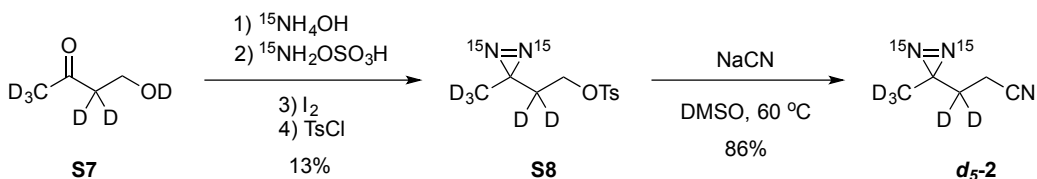

**2'-(3''-(Methyl-*d*<sub>3</sub>)-3''*H*-diazirin-3''-yl-1'',2''-<sup>15</sup>N<sub>2</sub>)ethyl-2',2'-*d*<sub>2</sub>-4-methylbenzenesulfonate (S8).** Compound **S7** was synthesized according to literature procedure (80%~86% deuteration by <sup>1</sup>H NMR).<sup>4</sup> To a solution of **S7** (1.28 g, 13.6 mmol) in aqueous <sup>15</sup>NH<sub>4</sub>OH (14 M, 2.91 mL, 40.8 mmol, 3 equiv) was added dropwise a solution of <sup>15</sup>NH<sub>2</sub>OSO<sub>3</sub>H (1.54 g, 13.6 mmol, 1.0 equiv) in MeOH (30 mL). The reaction was stirred at room temperature for 5 h. The solid was filtered off. The solvent was removed *in vacuo*. The concentrated solution was cooled down to 0 °C and MeOH/Et<sub>3</sub>N (40 mL/10 mL) was added, followed by the addition of I<sub>2</sub> portion wise (until a brown color persisted). The reaction was allowed to stir at room temperature for 1 h, and was quenched by the addition of brine (100 mL). The mixture was extracted with Et<sub>2</sub>O (100 mL × 3). The organic layers were combined, washed with saturated aqueous Na<sub>2</sub>S<sub>2</sub>O<sub>3</sub> (25 mL) and brine (25 mL). The organic layer was dried over Na<sub>2</sub>SO<sub>4</sub>, and filtered. The filtrate was concentrated *in vacuo*. To the crude residue was added pyridine (12 mL) and TsCl (3.11 g, 16.3 mmol, 1.2 equiv). The reaction mixture was allowed to stir overnight at room temperature and then was poured onto ice (120 g). The mixture was diluted with concentrated HCl (20 mL) and extracted with Et<sub>2</sub>O (100 mL). The organic layer was washed with saturated aqueous solution of NaHCO<sub>3</sub> (50 mL) and brine (25 mL). The organic layer was dried over Na<sub>2</sub>SO<sub>4</sub>, and filtered. The crude residue was purified by flash silica column chromatography (10% ethyl acetate–hexanes) to give **S8** as a yellow liquid (461.5 mg, 13% yield, 80% deuteration for CH<sub>2</sub>, 86% deuteration for CH<sub>3</sub> by <sup>1</sup>H NMR). *R*<sub>f</sub> = 0.53 (20% ethyl acetate–hexanes); <sup>1</sup>H NMR (400 MHz, CDCl<sub>3</sub>): δ 7.71 (d, *J* = 8.0 Hz, 2H), 7.28 (d, *J* = 8.0 Hz, 2H), 3.86 (s, 2H), 2.36 (s, 3H); <sup>13</sup>C NMR (126 MHz, CDCl<sub>3</sub>): δ 145.0, 132.7, 129.9, 127.9, 65.0, 34.1–33.3 (m, 1C), 21.6, two carbon (CD<sub>3</sub> and diazidine carbon) missing

due to low signal-to-noise; **FTIR** (neat),  $\text{cm}^{-1}$  1357, 1188, 1173, 976, 870, 813, 657, 552; **HRMS-ESI** ( $m/z$ ) calcd. for  $\text{C}_{11}\text{H}_9\text{D}_5^{15}\text{N}_2\text{O}_3\text{SNa}$  ( $[\text{M}+\text{Na}]^+$ ): 284.0877; found: 283.0808.

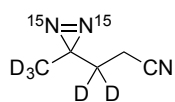

**3-(3'-(Methyl- $d_3$ )-3' $H$ -diazirin-3'-yl-1',2'- $^{15}\text{N}_2$ )propanenitrile-3,3- $d_2$  ( $d_5$ -2).** To a solution of **S8** (104.8 mg, 0.4 mmol) in DMSO (1 mL) was added NaCN (23.5 mg, 0.48 mmol). The resulting mixture was allowed to stir at 60 °C for 5 h and then was quenched by the addition of  $\text{H}_2\text{O}$  (3 mL).

The mixture was extracted with  $\text{Et}_2\text{O}$  (4 mL  $\times$  3). The organic layers were combined, washed with brine (4 mL), dried over  $\text{Na}_2\text{SO}_4$ , and filtered through a pale of silica gel. The filtrate was concentrated *in vacuo* to give  **$d_5$ -2** as a yellow liquid (40.0 mg, 86% yield, 80% deuteration for  $\text{CH}_2$ , 86% deuteration for  $\text{CH}_3$  by  $^1\text{H}$  NMR).  $R_f$  = 0.50 (25% ethyl acetate–hexanes);  $^1\text{H}$  NMR (500 MHz,  $\text{CDCl}_3$ ):  $\delta$  2.21 (s, 2H);  $^{13}\text{C}$  NMR (126 MHz,  $\text{CDCl}_3$ ):  $\delta$  118.4, 30.8–29.9 (m, 1C), 19.2–18.2 (m, 1C), 12.1 (d,  $J$  = 10.0 Hz), one carbon (diazirine carbon) missing due to low signal-to-noise; **FTIR** (neat),  $\text{cm}^{-1}$  2934, 2247, 1537, 1427, 1046, 714; Satisfactory HRMS data could not be obtained.

## 6. Synthesis of diazirine-labeled choline derivative (5).

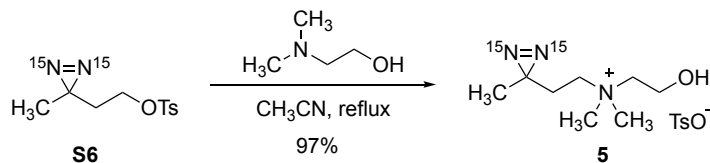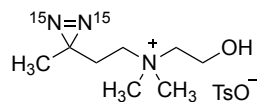

**2-Hydroxy- $N,N$ -dimethyl- $N$ -(2-(3'-(Methyl- $d_3$ )-3' $H$ -diazirin-3'-yl-1',2'- $^{15}\text{N}_2$ )ethyl)ethan-1-ammonium 4-methylbenzenesulfonate (5).** To a solution of **S6** (25.6 mg, 0.1 mmol) in MeCN (100  $\mu\text{L}$ ), was added 2-dimethylaminoethanol (10.1  $\mu\text{L}$ , 0.1 mmol). The reaction was heated to 80 °C for 20 h. The solvent was removed *in vacuo* to give **5** as a yellow-brown

semi-solid (33.5 mg, 97% yield).  $^1\text{H}$  NMR (500 MHz,  $\text{CDCl}_3$ ):  $\delta$  7.71 (d,  $J$  = 8.0 Hz, 2H), 7.24 (d,  $J$  = 8.0 Hz, 2H), 4.05–3.85 (m, 2H), 3.55–3.35 (m, 4H), 3.11 (s, 6H), 2.37 (s, 3H), 1.95–1.75 (m, 2H), 1.07 (s, 3H);  $^{13}\text{C}$  NMR (126 MHz,  $\text{CDCl}_3$ ):  $\delta$  143.6, 141.7, 129.8, 126.9, 66.4, 61.3, 56.8, 52.2, 29.2, 24.3 (t,  $J$  = 8.8 Hz), 21.3, 19.3; **FTIR** (thin film),  $\text{cm}^{-1}$  3348, 1491, 1220, 1182, 1120, 824, 684, 564; **HRMS-ESI** ( $m/z$ ) calcd. for  $\text{C}_{15}\text{H}_{25}\text{N}^{15}\text{N}_2\text{O}_4\text{S}$  ( $[\text{M}-\text{OTs}]^+$ ): 174.1384; found: 174.1385.

## II. Hyperpolarization Details

### II.1 Experimental details

#### General Information

Measurements are carried out on a Magritek Spinsolve Nitrogen (1 T) or Bruker Avance DX 360 (8.45 T). *Para*-hydrogen was supplied from a commercially available Bruker BPHG090 (Conversion temperature 32.6 K, 92.6 % *para*-H<sub>2</sub>).

#### Sample preparation:

Stock solutions 5 mM in precatalyst (either [IrCl(COD)(IMes)] or [Ir(COD)(IMes)Pyr]PF<sub>6</sub>), 100 mM in diazirine (**1 - 5**, and deuterated variants thereof) and 50 mM in Lewis-basic additives (CH<sub>3</sub>CN, Pyridine) were added to a suitable volume of methanol-d<sub>4</sub> to obtain desired concentrations in the respective compounds ( $c_{\text{Cat}} = 0.125$  mM,  $c_{\text{Sub}} = 12.5$  mM,  $c_{\text{Additive}} = 1$  mM). The D<sub>2</sub>O additive could be added directly ( $c = 925$  mM). Note that the water concentration was chosen to obtain conditions identical to those used in a previous study.<sup>[1]</sup> Samples prepared with [IrCl(COD)(IMes)] without additional Lewis basic additives turned dark red on exposure to hydrogen, no SABRE effect could be observed.

#### Hyperpolarization conditions:

Precatalysts were transformed to the catalytically active species under a hydrogen atmosphere (10 bar) species in presence of diazirine and Lewis-basic additives by bubbling *para*-H<sub>2</sub> through the solution (20 minutes, 20 sccm/min). Diazirine **3** is not indefinitely stable under the experimental conditions and the catalyst is activated in presence of LB additive only. Substrate is added under 1 bar of Ar and the sample subsequently pressurized with *para*-H<sub>2</sub>.

The sample was transferred to a fixed magnetic evolution field of 0.5 μT and *para*-H<sub>2</sub> was supplied at a flow rate of 100 sccm/min for 150 s. The flow is stopped and the sample is transferred to a Magritek Spinsolve Nitrogen (1 T) or Bruker Avance DX 360 (8.45 T) for detection. Transfer time to 1 T is 4 s, to 8.45 T transfer time is 8 s.

#### Determination of enhancement/polarization

A single scan NMR spectrum on the hyperpolarized compound with a 90° excitation pulse is compared to a reference of neat <sup>15</sup>N acetonitrile (Cambridge Isotope Laboratories, 98 %+, 19.1 M, B = 8.45 T, see Figure S1) to determine enhancements. Absolute polarization is calculated from the recorded enhancements.

#### 15N NMR:

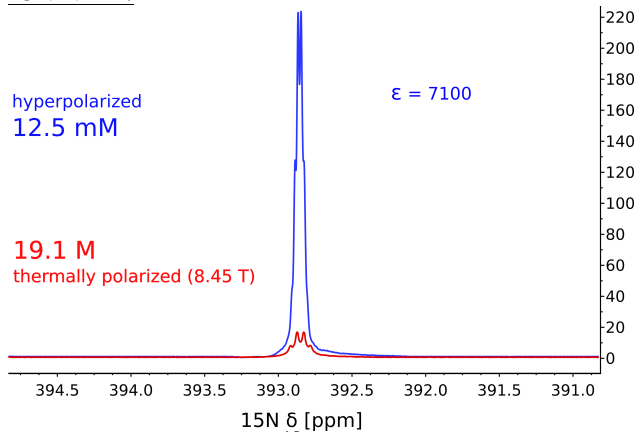

**S1.** Comparison between <sup>15</sup>N spectra. Red: thermally polarized reference of <sup>15</sup>N-CH<sub>3</sub>CN ( $c = 19.1$  M,  $^3J_{\text{NH}} = 1.7$  Hz, 99.8%+, Cambridge Isotope Laboratories,  $B_0 = 8.45$  T, shifted by 200 ppm for easier comparison). Blue: 12.5 mM diazirine **d<sub>0</sub>-2** (observed is the average  $^3J_{\text{NH}} = 0.75$  Hz).

#### **T<sub>1</sub> measurements**

$T_1$  measurements were carried out using sequential small tip angle excitation/acquisition methods. The time delay  $dt$  between individual acquisitions is 4.2 s at 8.45 T and 30 s at 1 T. The number of points is 16 at 8.45 T and eight at 1 T (see Figure S2). Data is processed with Mnova 8.0.1-10878 (baseline correction, line-broadening = 0.5 Hz (8.45 T) or 5 Hz (1 T)).

#### **3-(3'-(Methyl-d<sub>3</sub>)-3'H-diazirin-3'-yl-1',2'-<sup>15</sup>N<sub>2</sub>)propanenitrile (**2**).**

<sup>15</sup>N-NMR (36 MHz, [D<sub>4</sub>]MeOH, CD<sub>2</sub>HOD, 22 °C):  $\delta = 393.3$  ppm (s).

#### **3-(3'-methyl-3'H-diazirin-3'-yl-1',2'-<sup>15</sup>N<sub>2</sub>)propanenitrile (**d<sub>0</sub>-2**).**

<sup>15</sup>N-NMR (36 MHz, [D<sub>4</sub>]MeOH, CD<sub>2</sub>HOD, 22 °C):  $\delta = 392.9$  ppm (h,  $^3J_{\text{NH}} = 0.75$  Hz).



**3-(3'-(methyl-d<sub>3</sub>)-3'H-diazirin-3'-yl-1',2'-<sup>15</sup>N<sub>2</sub>)propanenitrile-3,3-d<sub>2</sub> (d<sub>5</sub>-2)**

<sup>15</sup>N-NMR (36 MHz, [D<sub>4</sub>]MeOH, CD<sub>2</sub>HOD, 22 °C): δ = 393.2 ppm (m).

**3-(3'-(Methyl-d<sub>3</sub>)-3'H-diazirin-3'-yl-1',2'-<sup>15</sup>N<sub>2</sub>)propanoic acid (3).**

<sup>15</sup>N-NMR (36 MHz, [D<sub>4</sub>]MeOH, CD<sub>2</sub>HOD, 22 °C): δ = 396.5 ppm (s).

**3-(2'-((tert-butyldimethylsilyloxy)ethyl)-3-(methyl-d<sub>3</sub>)-3H-diazirine-1,2-<sup>15</sup>N<sub>2</sub> (4)**

<sup>15</sup>N-NMR (36 MHz, [D<sub>4</sub>]MeOH, CD<sub>2</sub>HOD, 22 °C): δ = 400.0 ppm (s).

**2-hydroxy-N,N-dimethyl-N-(2'-(3''-methyl-3''H-diazirin-3''-yl-1'',2''-<sup>15</sup>N<sub>2</sub>)ethyl)ethan-1-ammonium 4-methylbenzenesulfonate (5).**

<sup>15</sup>N-NMR (36 MHz, [D<sub>4</sub>]MeOH, CD<sub>2</sub>HOD, 22 °C): δ = 392.2 ppm (h, *J* = 0.76 Hz).

Note that *J*-couplings from <sup>15</sup>N to deuterium (*I* = 1) are characteristically smaller and multiplicity higher. Labeled substrates didn't allow to accurately determine the full set of coupling constants. Often only one line is resolved as a result of the field cycling process involved in SABRE SHEATH (vide infra).

II.2 *T*<sub>1</sub> measurements:

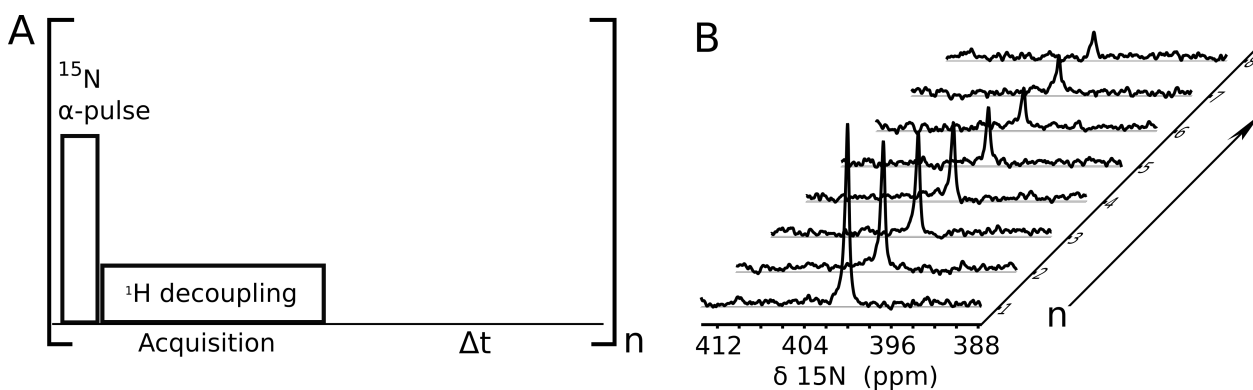

**S2:** A) Pulse sequence used for small pulse angle *T*<sub>1</sub> measurements, B) 1 T spectra at each individual time point. The first spectrum (*n* = 1) is acquired at *t* = 0 s, Δ*t* is 30 s, <sup>15</sup>N pulse angle is 6°. Data in B) from Diazirine 4, catalyst B.

The Signal to Noise Ratio (SNR) gets progressively worse for each successive time point in a *T*<sub>1</sub> experiment (see Figure S1B). For hyperpolarized studies, the experimental error of the *T*<sub>1</sub> values depends directly on the enhancement, which defines the initial signal intensity. *T*<sub>1</sub> in combination with *S*<sub>0</sub>, defines the remaining signal intensity *S*(*t*) at increment *i*.

Furthermore, the signal to noise ratio depends on the magnetic field of detection. For a coil detected NMR experiment with thermal coil noise (Johnson-Noise) as dominant noise source the SNR is given as the product of polarization and induction (proportional to *B*<sub>0</sub>) and the noise, which scales as *B*<sub>0</sub><sup>1/4</sup>. For a hyperpolarized NMR sample, the polarization is independent of the magnetic field of detection. Accordingly, the SNR is proportional to *B*<sub>0</sub><sup>3/4</sup>. The expected increase of the SNR, when changing the detection field from 1 T to 8.45 T is thus roughly a factor nine.

In low magnetic fields scalar relaxation of the second kind dominates relaxation. Here, polarization decays with a rate given by *T*<sub>2</sub> of the coupling partner. Our observation of the relaxation field dependence for deuterated compounds imply that <sup>2</sup>H has a much shorter *T*<sub>2</sub> at low fields than <sup>1</sup>H. Accordingly lower enhancements are observed for deuterated compounds, more generally nuclei with strong couplings to an adjacent quadrupole.

In the region from 3 G to 2 T relaxation times are almost field independent pointing to dipole-dipole relaxation as dominant relaxation mechanism. At even higher field above 2 T significant shortening of *T*<sub>1</sub> is observed. Relaxation originating from chemical shift anisotropy (CSA) scales with *B*<sub>0</sub><sup>2</sup> and has been reported to be the major relaxation mechanism for <sup>15</sup>N in high field.

For determination and comparison of *T*<sub>1</sub> values reported in the main text resonances at the individual time points in a *T*<sub>1</sub> experiment are evaluated by Lorentzian line fitting. We find that line intensity yields the smallest systematic error, as shimming artifacts, and noise contribution to the integral (evaluation by direct integration) and noise contribution to the apparent area (line fitting) are most effectively suppressed, as exemplified in Figure S3. The resulting values are evaluated by fitting the first order exponential decay *f*(*t*) = *A*<sub>0</sub> exp(-*t*/*T*<sub>1</sub>) + *y*<sub>0</sub>, with initial signal intensity *A*<sub>0</sub> and relaxation time constant *T*<sub>1</sub>. The *T*<sub>1</sub> relaxation data for the different compounds is shown in Table S1.

In Table S2 the field dependence of *T*<sub>1</sub> for the isotopically differentiated compounds **d0-2**, **d3-2** and **d5-2** is shown. The individual points are acquired by subjecting the sample to the SABRE SHEATH procedure and storing it in the holding field *B*<sub>hold</sub>.

Table S1:  $^{15}\text{N}-T_1$  at two different magnetic fields for diazirines **2-4**.

|          | Additive           | $^{15}\text{N}-T_1$ (1 T) [s] <sup>[a]</sup> | $^{15}\text{N}-T_1$ (8.45 T) [s] <sup>[b]</sup> |
|----------|--------------------|----------------------------------------------|-------------------------------------------------|
| <b>2</b> | Pyridine           | 168 ± 18                                     | 34.6 ± 1.9                                      |
| <b>2</b> | D <sub>2</sub> O   | 176 ± 3                                      | 28.3 ± 0.3                                      |
| <b>2</b> | CH <sub>3</sub> CN | 179 ± 16                                     | n.a. <sup>[c]</sup>                             |
| <b>4</b> | Pyridine           | 141 ± 4                                      | 29.4 ± 0.6                                      |
| <b>4</b> | D <sub>2</sub> O   | 164 ± 25                                     | 27.3 ± 0.7                                      |
| <b>4</b> | CH <sub>3</sub> CN | 263 ± 83                                     | n.a. <sup>[c]</sup>                             |
| <b>3</b> | Pyridine           | 215 ± 22                                     | 17.7 ± 1.8                                      |
| <b>3</b> | D <sub>2</sub> O   | 234 ± 28                                     | 16.9 ± 1.7                                      |
| <b>3</b> | CH <sub>3</sub> CN | 172 ± 17                                     | n.a. <sup>[c]</sup>                             |

[a]  $T_1$  determined from line intensity, for details see text. [b]  $T_1$  determined from integral data. [c] samples with CH<sub>3</sub>CN additive are not long term stable.

Table S2: Field dependence of  $^{15}\text{N}-T_1$  for different isotopic labeling.

| $B_{\text{hold}}$ [T] | <b>d0-2</b> , $T_1$ [s] | <b>d5-2</b> , $T_1$ [s] |
|-----------------------|-------------------------|-------------------------|
| $3 \cdot 10^{-4}$     | 210                     | 190                     |
| $6.5 \cdot 10^{-3}$   | 210                     | 290                     |
| 0.1                   | 155                     | 200                     |
| 0.25                  | 140                     | 210                     |
| 0.5                   | 173                     | 198                     |
| 1                     | 187                     | 160                     |
| 2                     | 180                     | 146                     |
| 8.45                  | 34                      | 31                      |

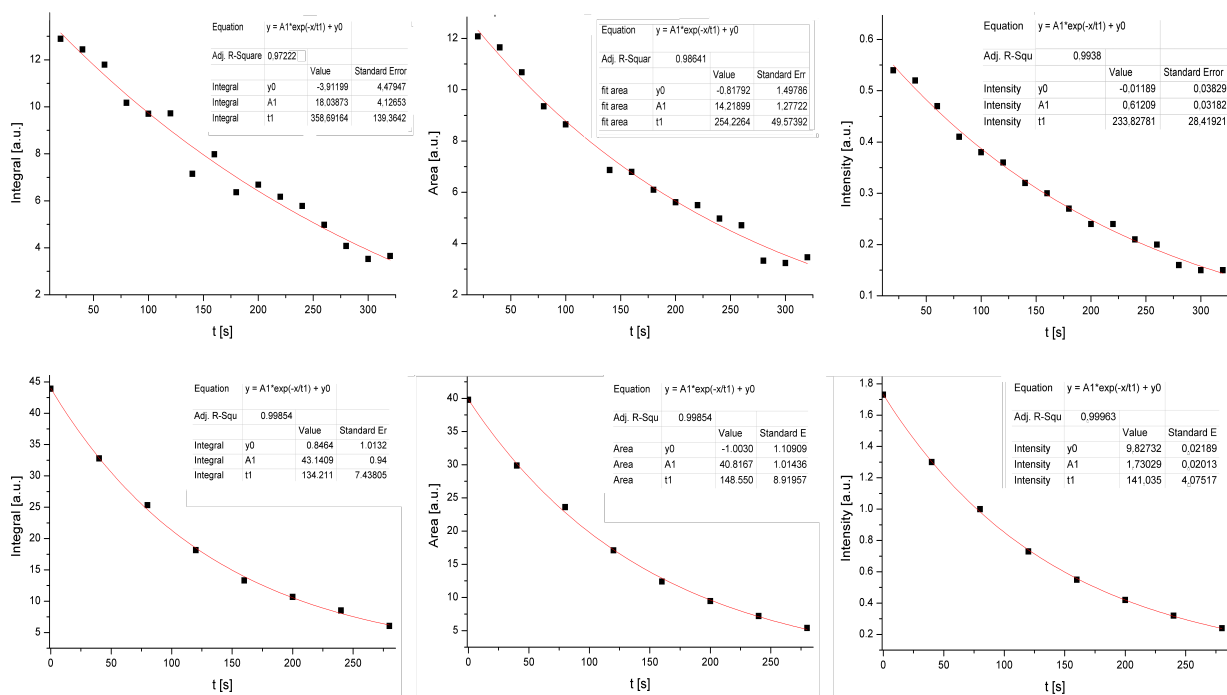

S3. Comparison between different  $T_1$  evaluation methods. From left to right: integral, area and the intensity for (top) diazirine-COOH **3**, additive D<sub>2</sub>O, enhancement 1.900. Bottom: diazirine-OTBS (**4**), additive pyridine, Enhancement 16.000.

As shown in Figure S4. for large enhancements, or equivalently large SNR at high fields, the choice of evaluation routine is irrelevant. Detection at 8.45 T or enhancements over 10.000 yield the same result within the fit error irrespective of the method.

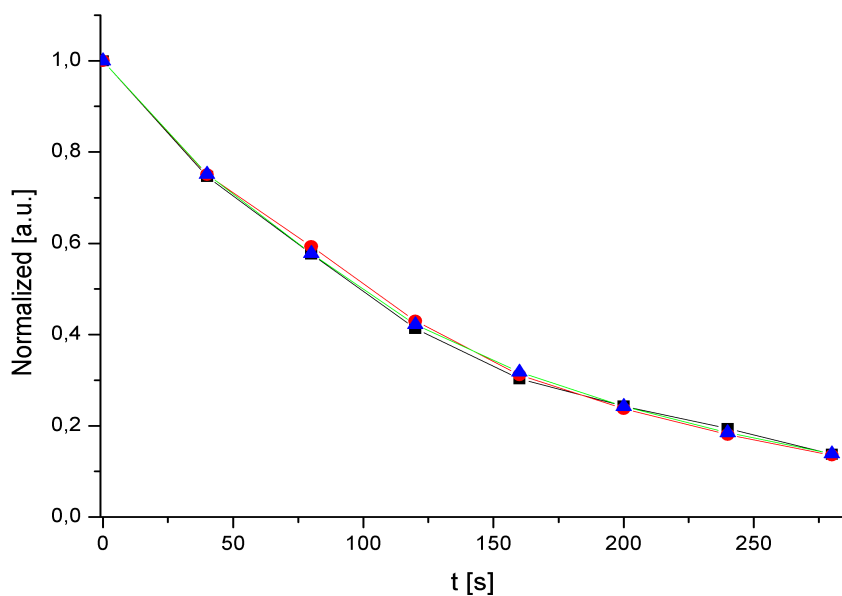

**S4.** Comparison between normalized Integral (blue), area (red), and intensity (green) for diazirine-OTBS (**4**). With large enhancements, equivalently.

### III. References.

1. Theis, T.; Ortiz Jr., G. X.; Logan, A.; Claytor, K.; Feng, Y.; Kuhn, W.; Blum, V.; Malcolmson, S.; Chekmenev, E. Y.; Wang, Q.; Warren, W. S. *Sci. Adv.* **2016**, *2*, e1501438.
2. Vervacke, J. S.; Funk, A. L.; Wang, Y.; Strom, M.; Hrycyna, C. A.; Distefano, M. D. *J. Org. Chem.* **2014**, *79*, 1971–1978.
3. Bond, M. R.; Zhang, H.; Vu, P. D.; Kohler, J. J. *Nat. Protoc.* **2009**, *4*, 1044–1063.
4. Kirst, D. T.; Statsyuk, A. V. *Biochemistry* **2015**, *54*, 4411–4414.

#### IV. $^1\text{H}$ and $^{13}\text{C}$ NMR Spectra.

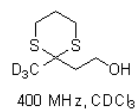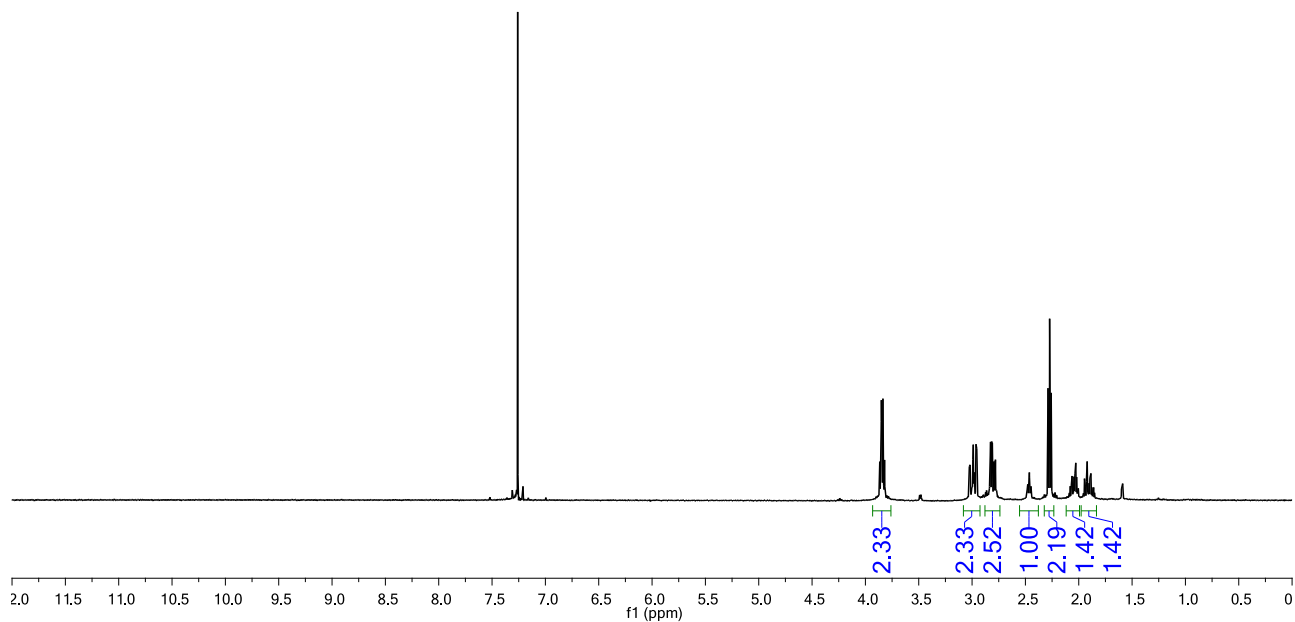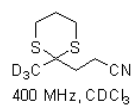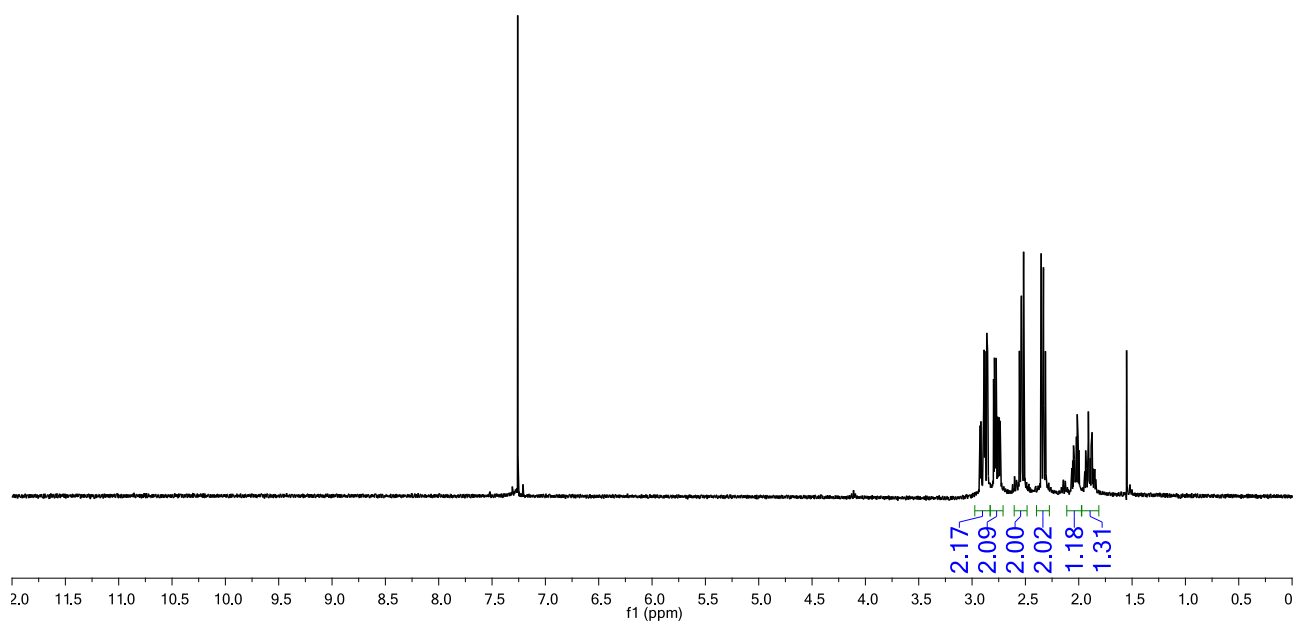

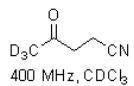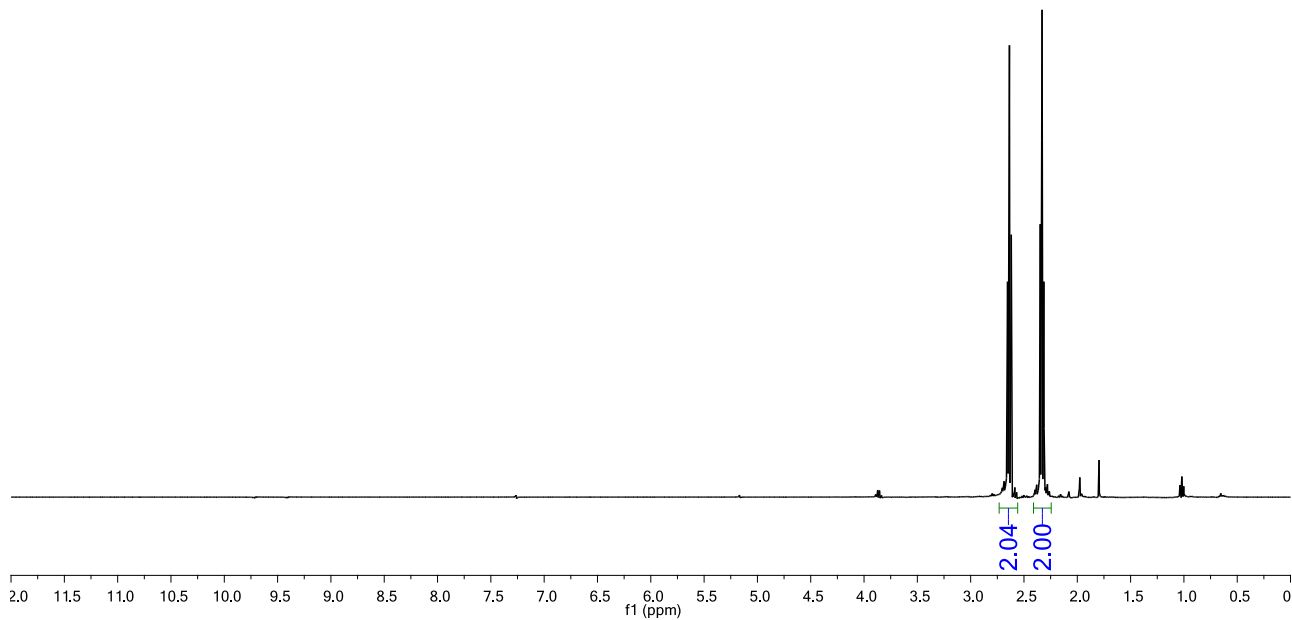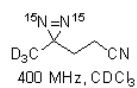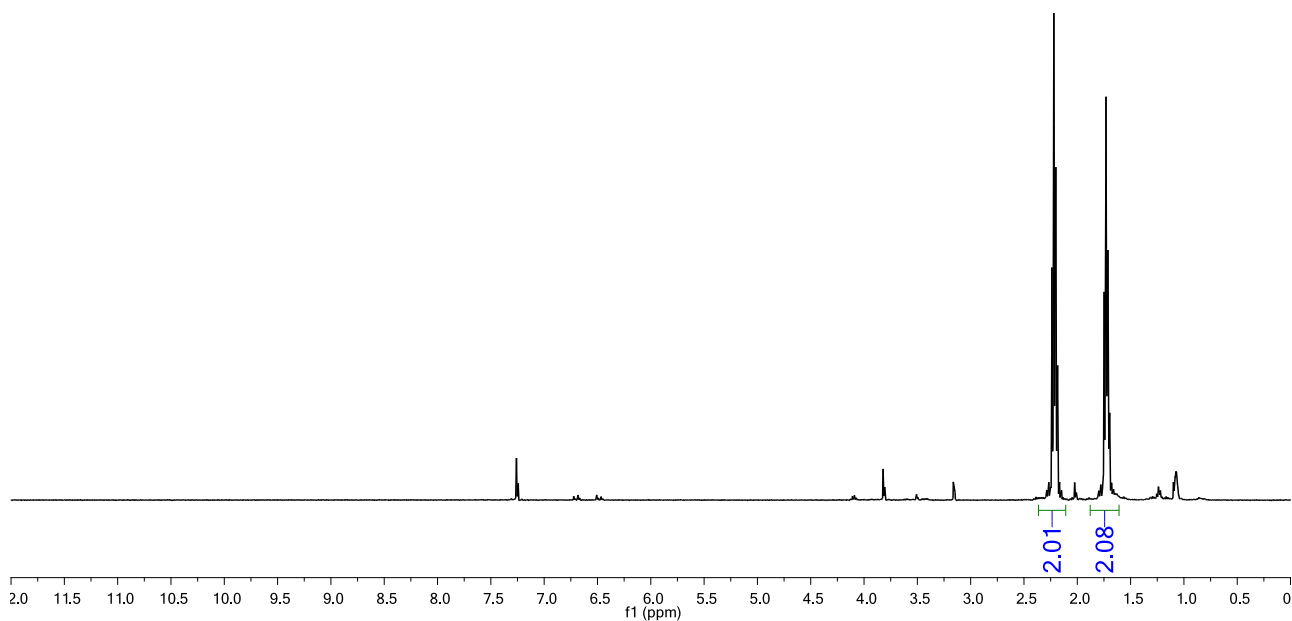

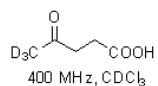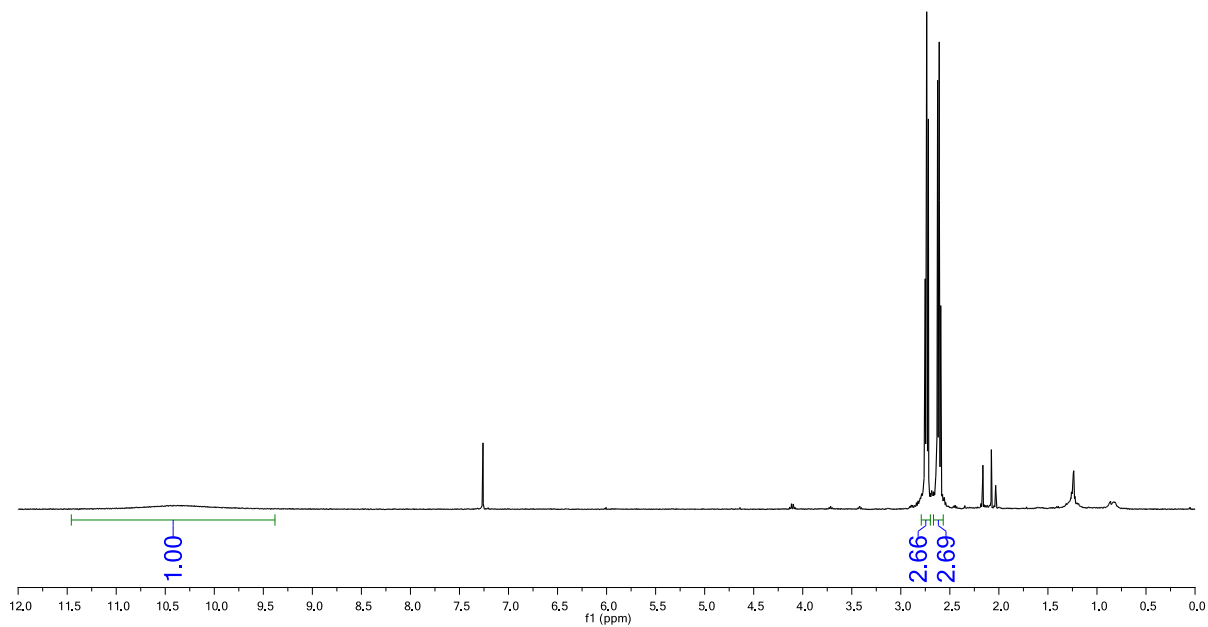

— 206.78

— 178.60

{ 77.32  
77.00  
76.68

— 37.61

— 27.71

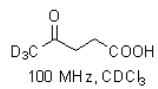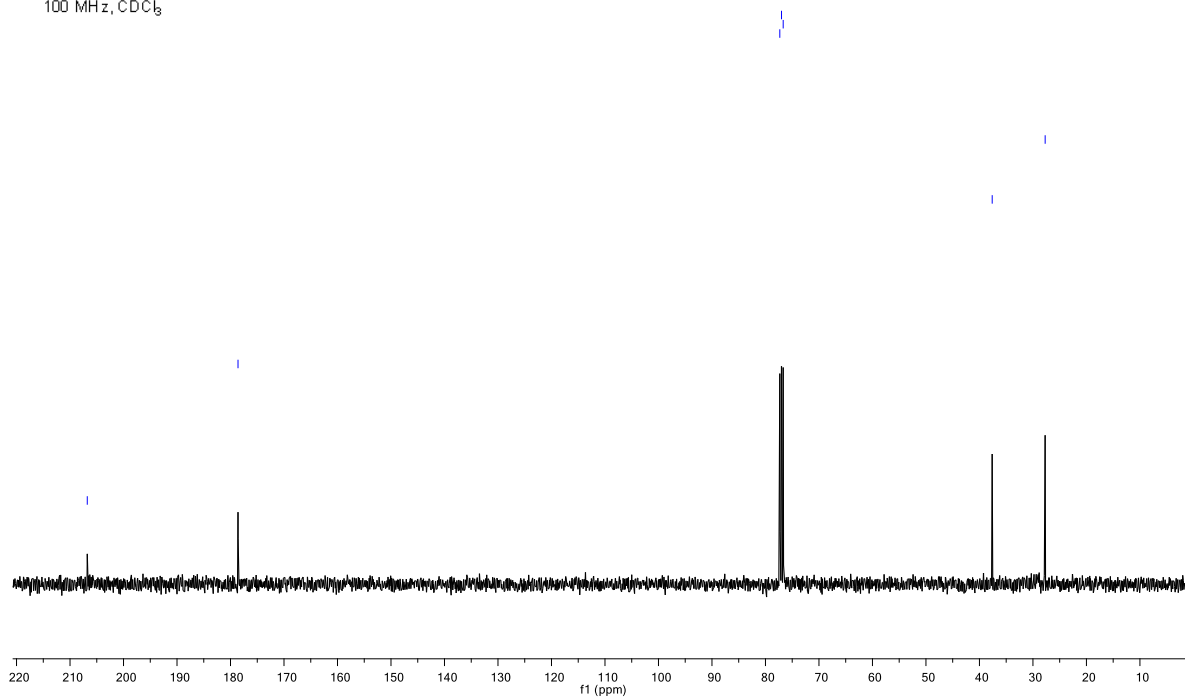

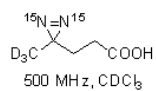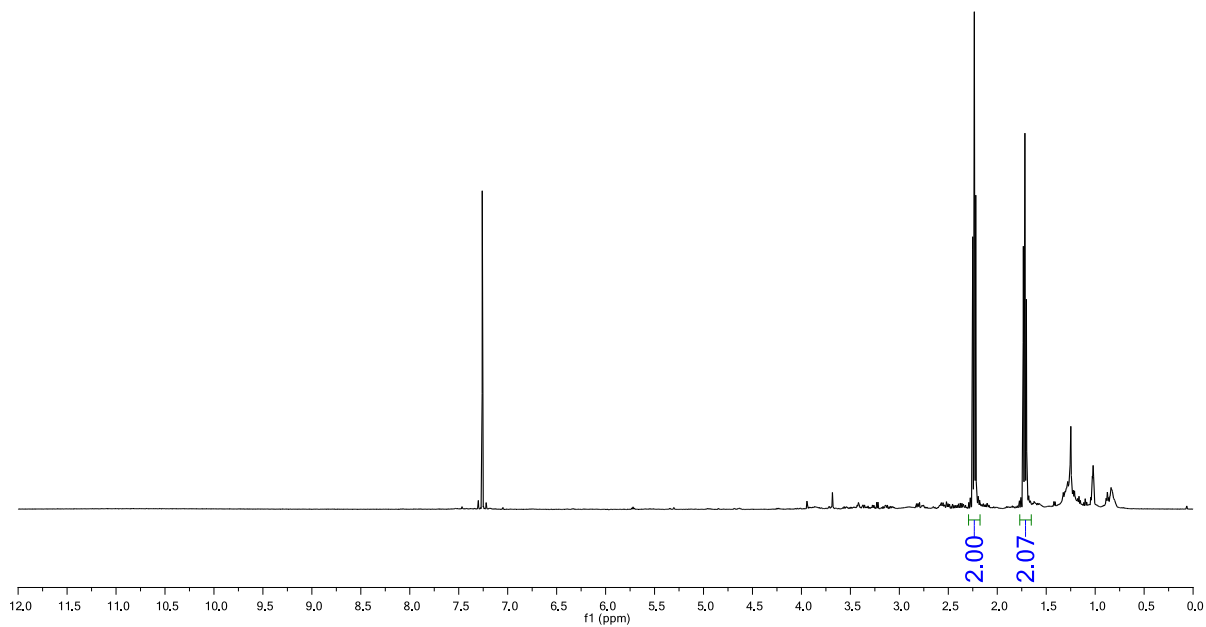

— 177.67

77.25  
77.00  
76.75

29.27  
28.36

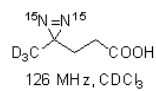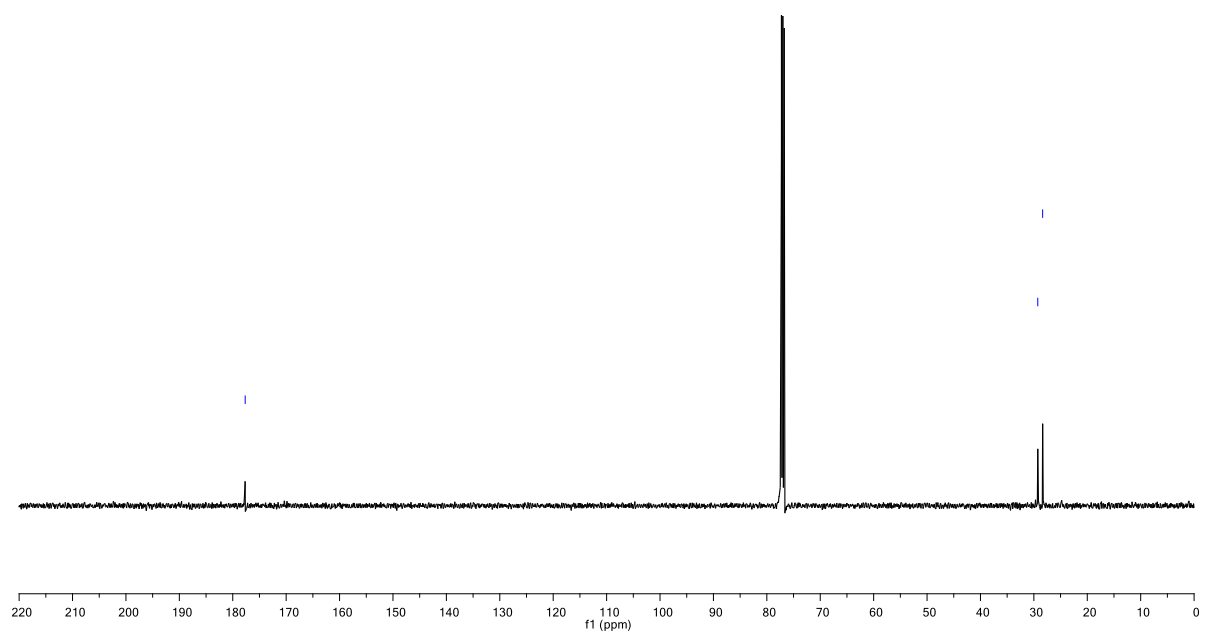

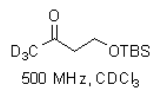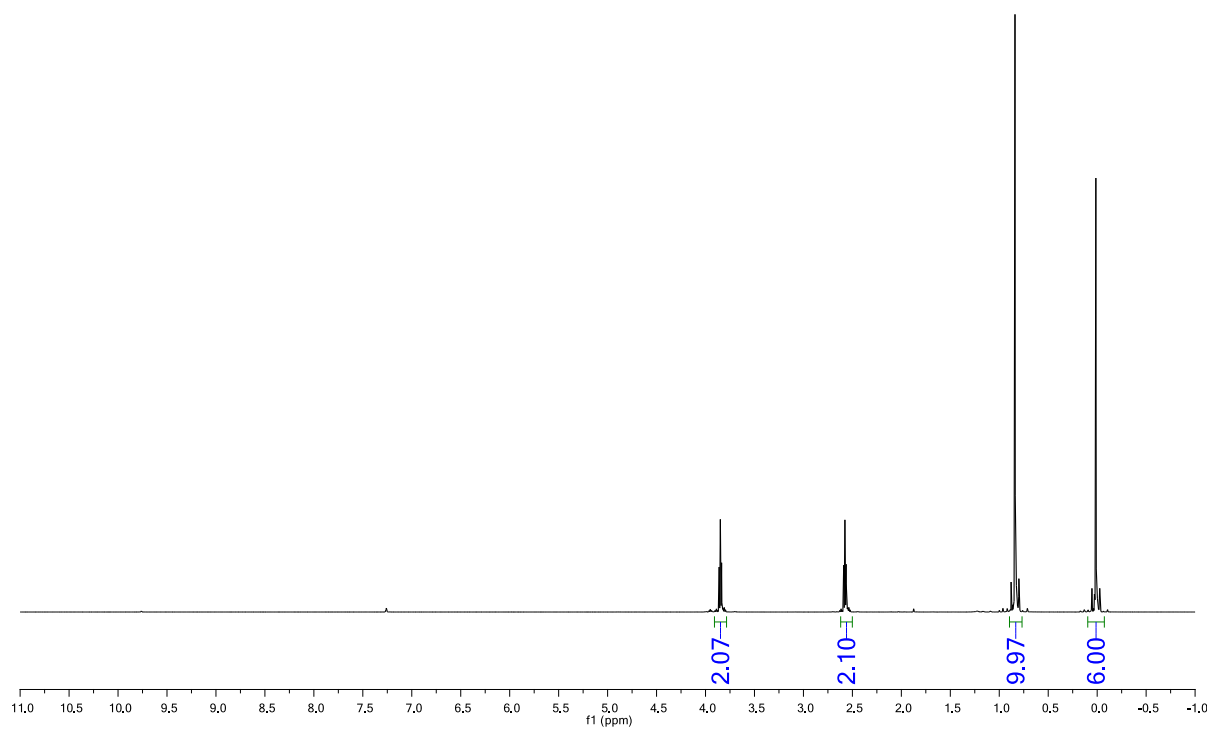

— 208.07

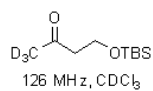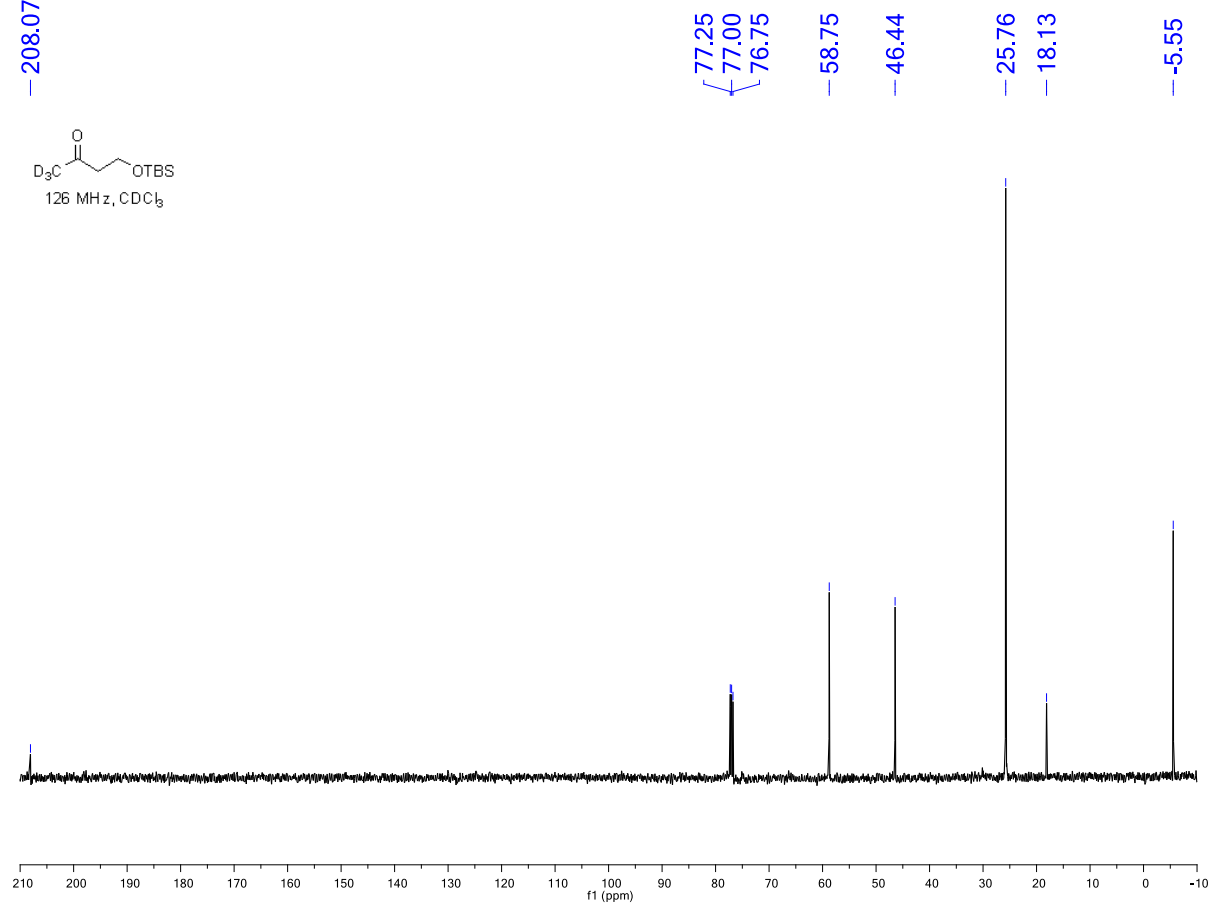



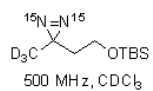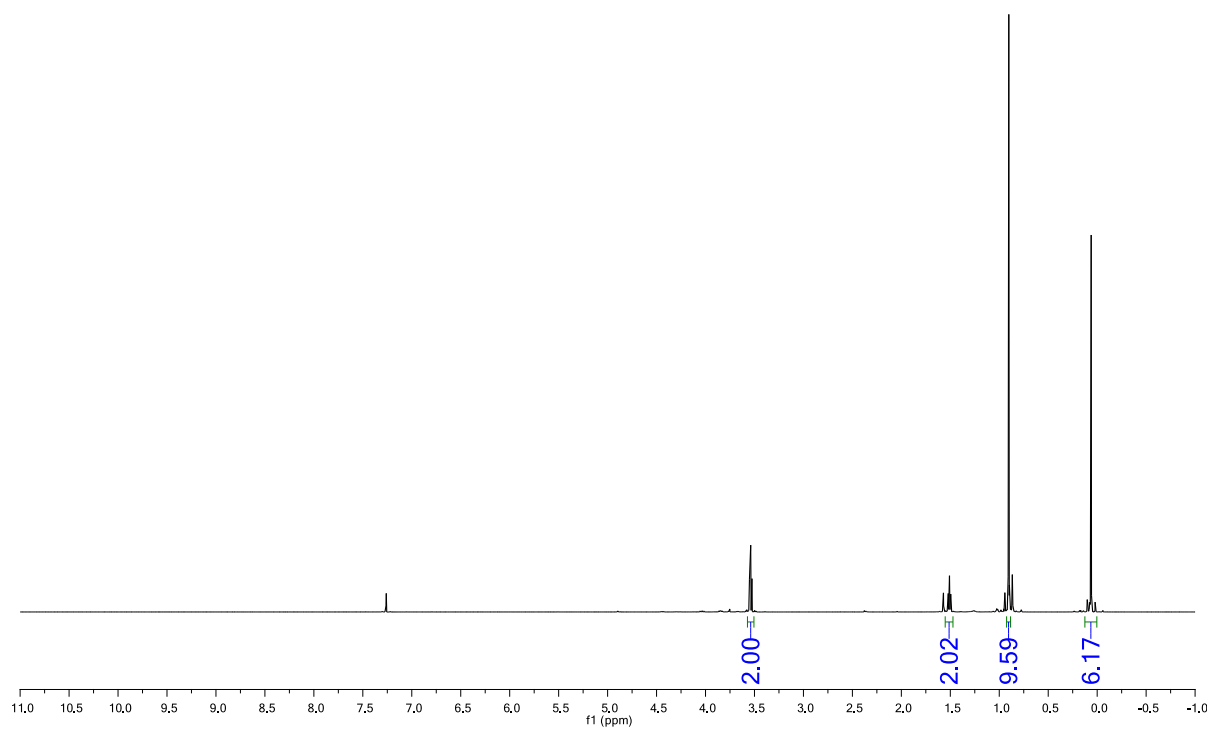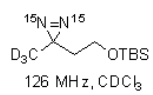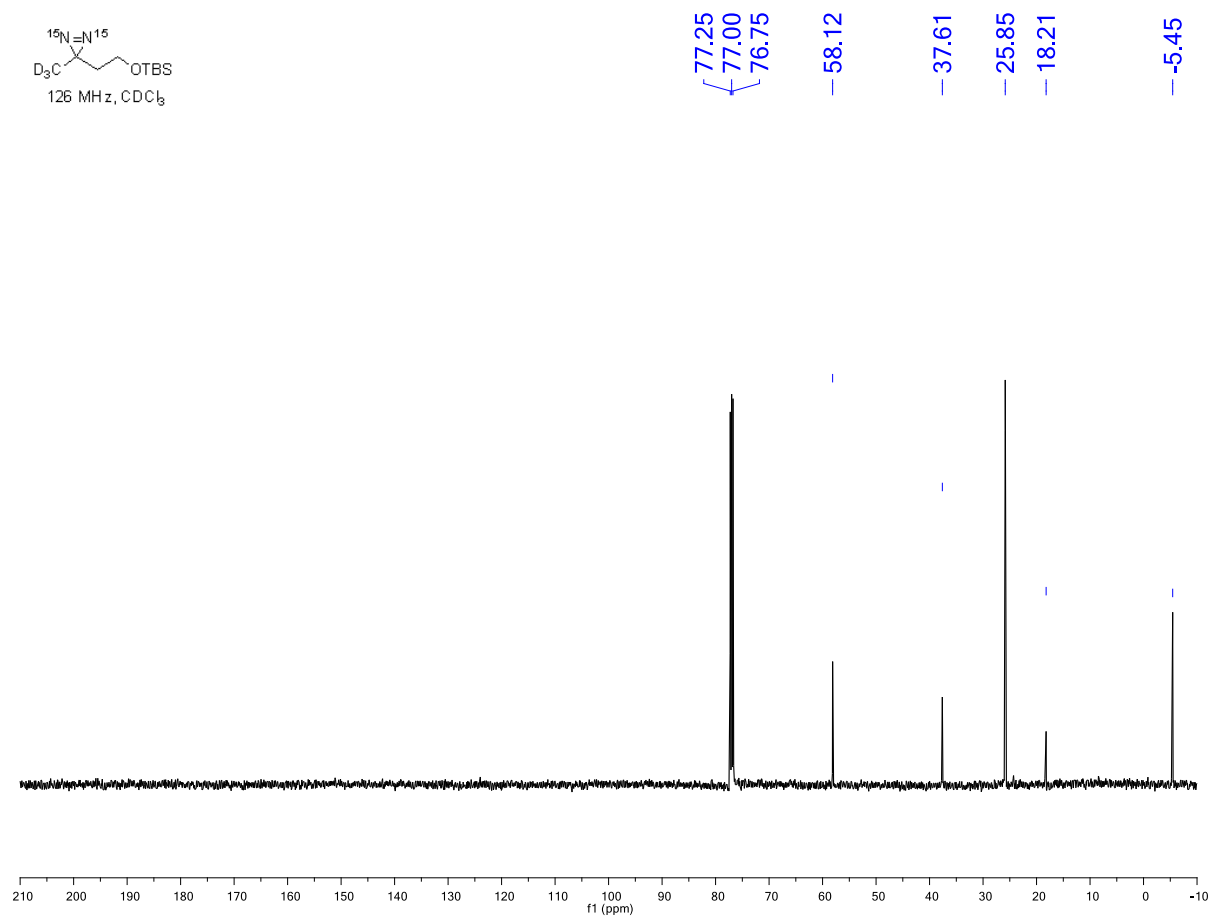

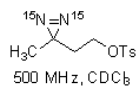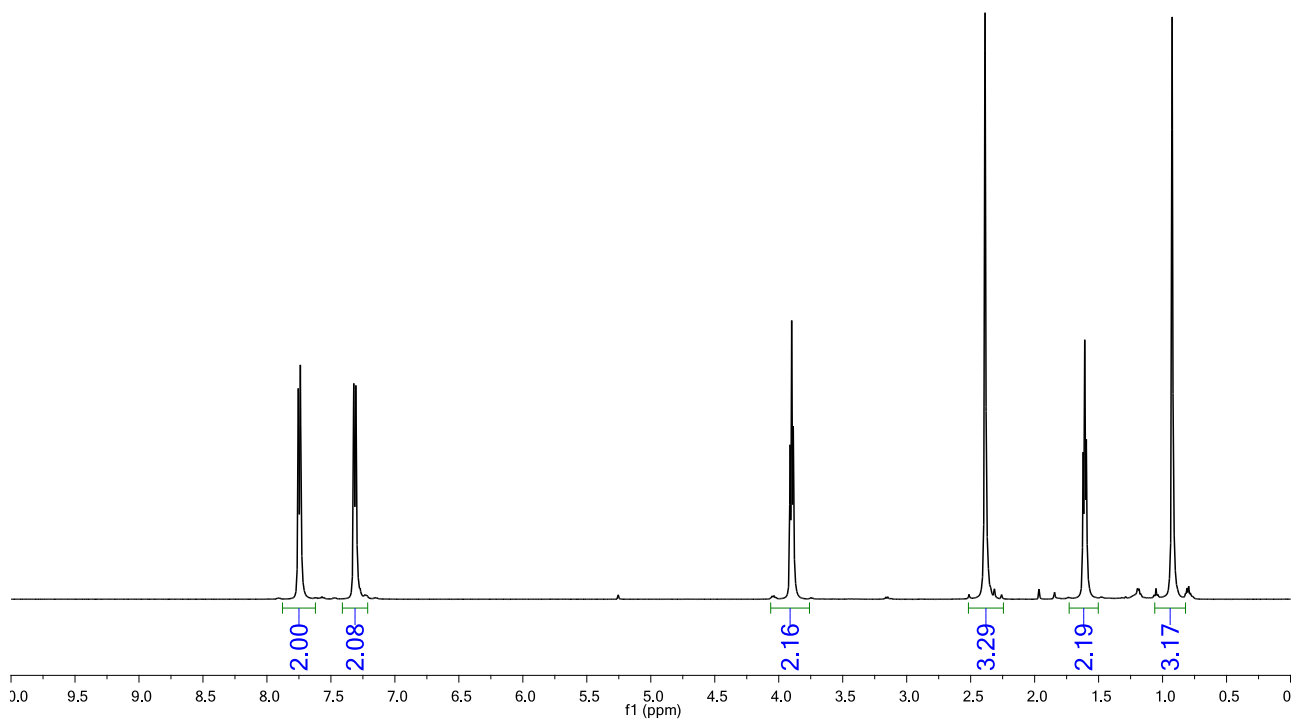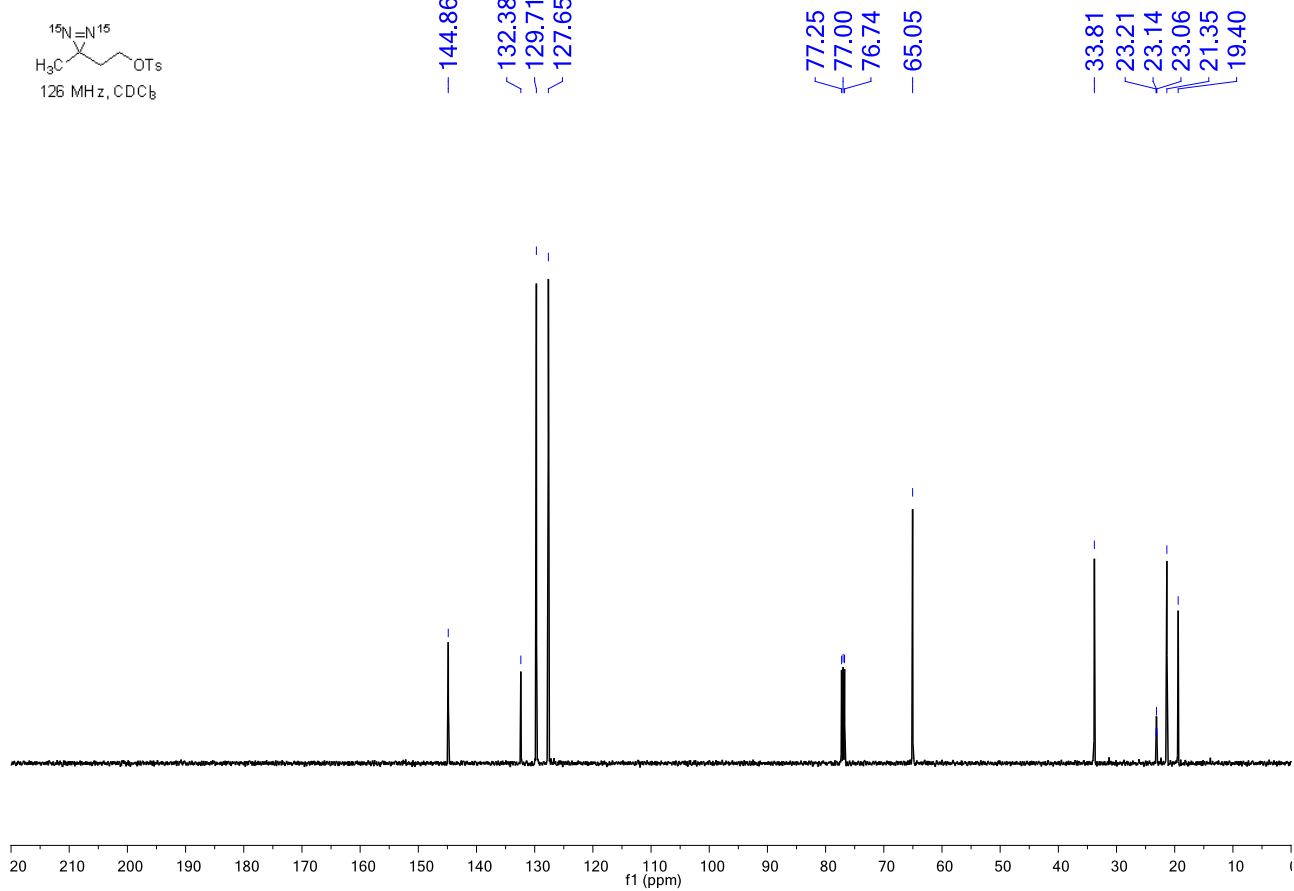

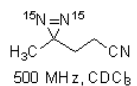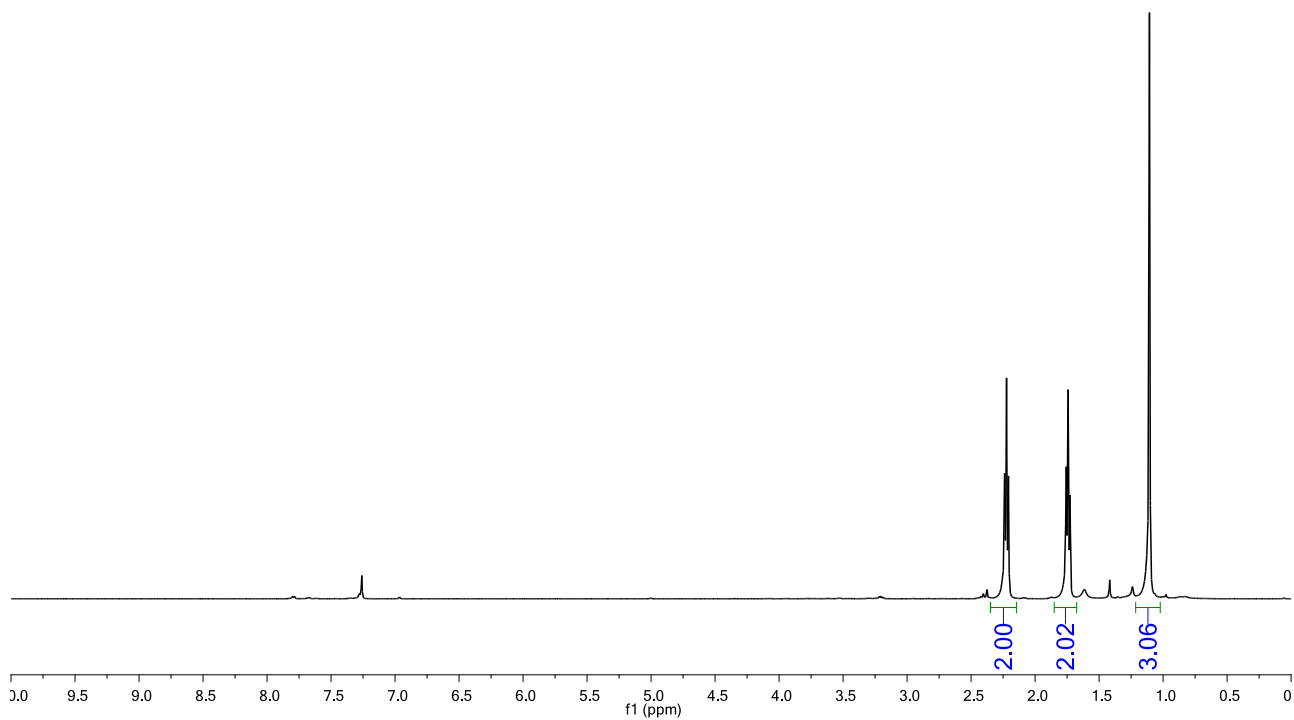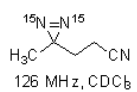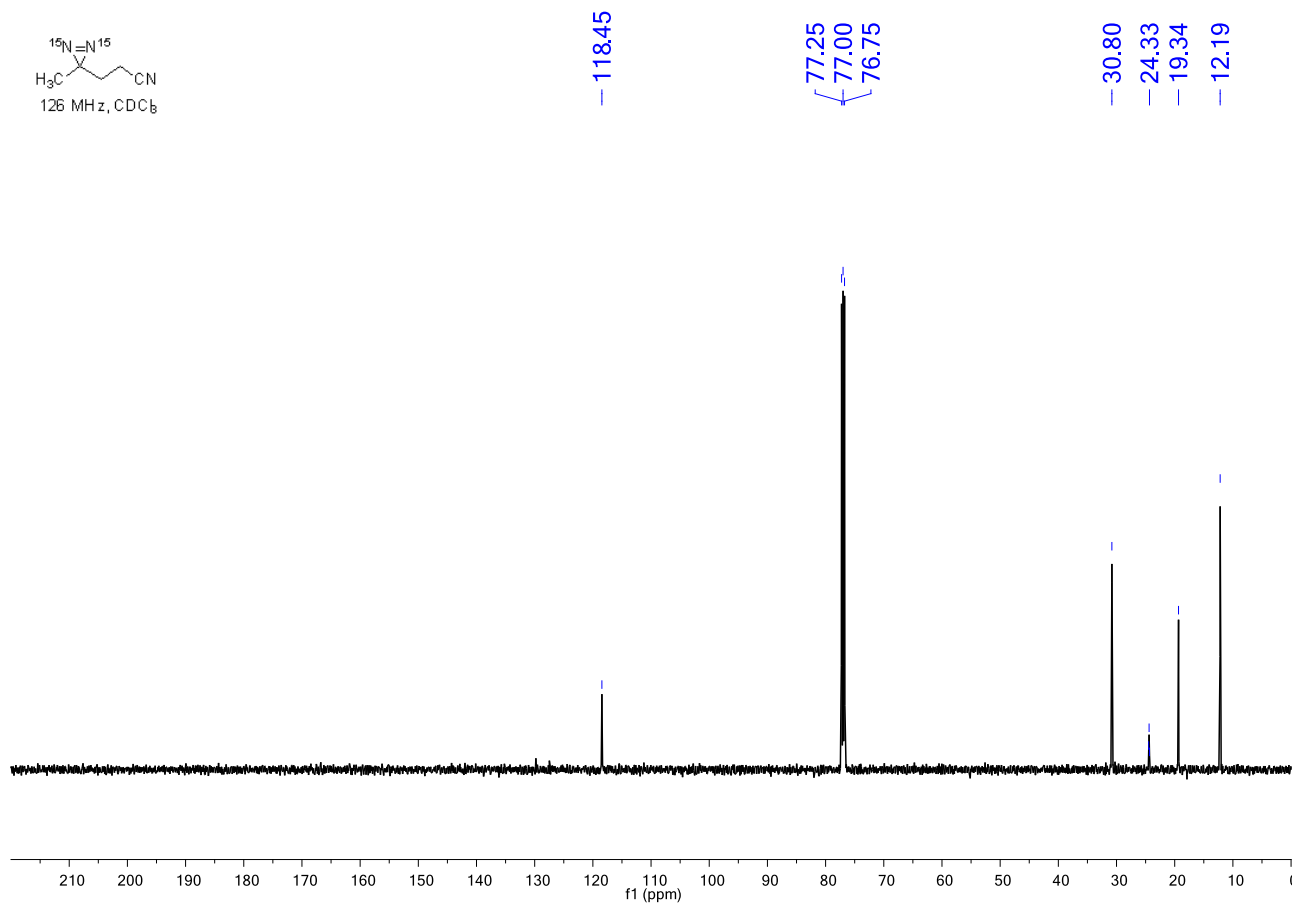

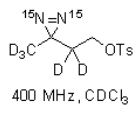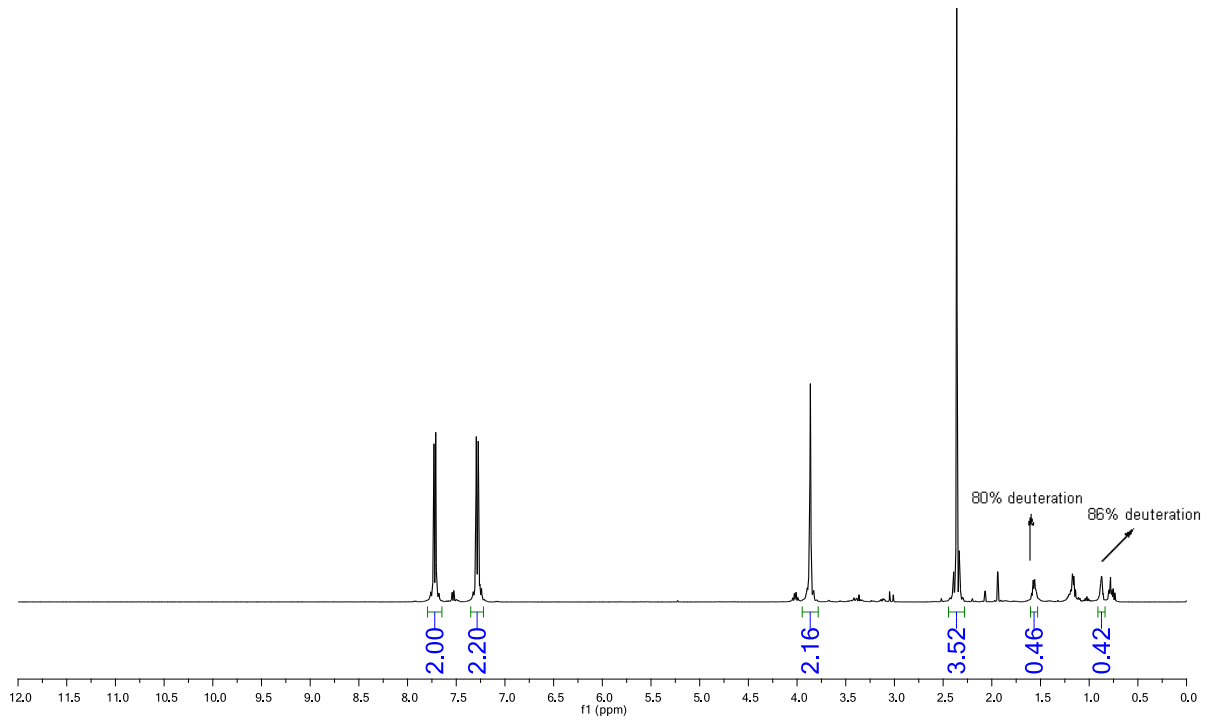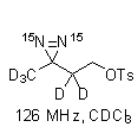

145.00  
 132.72  
 129.89  
 127.95  
 77.25  
 77.00  
 76.75  
 64.97  
 33.93  
 33.78  
 33.64  
 33.48  
 21.65

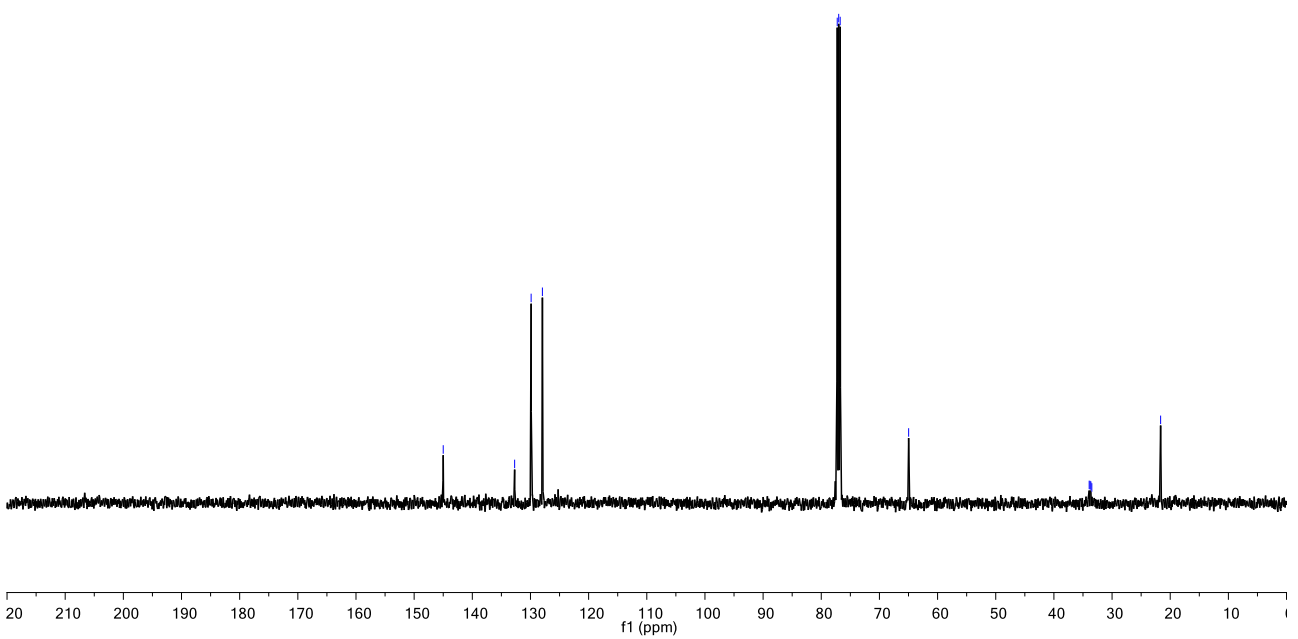

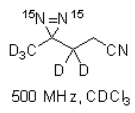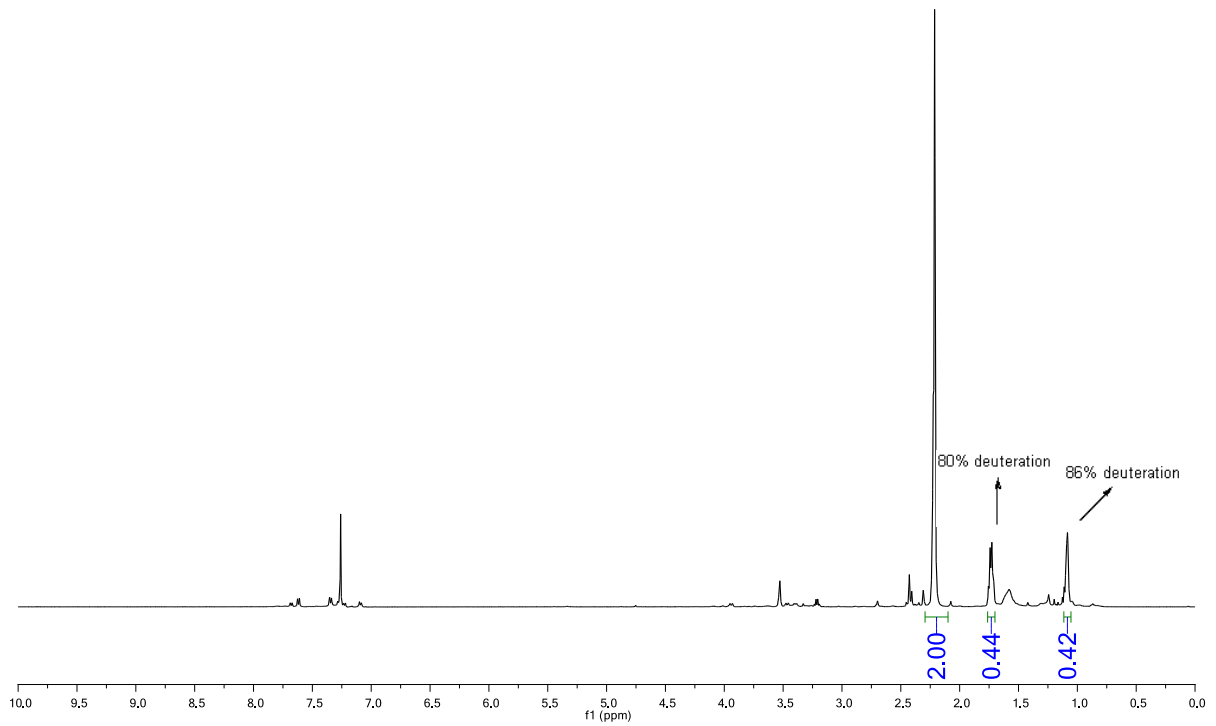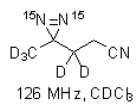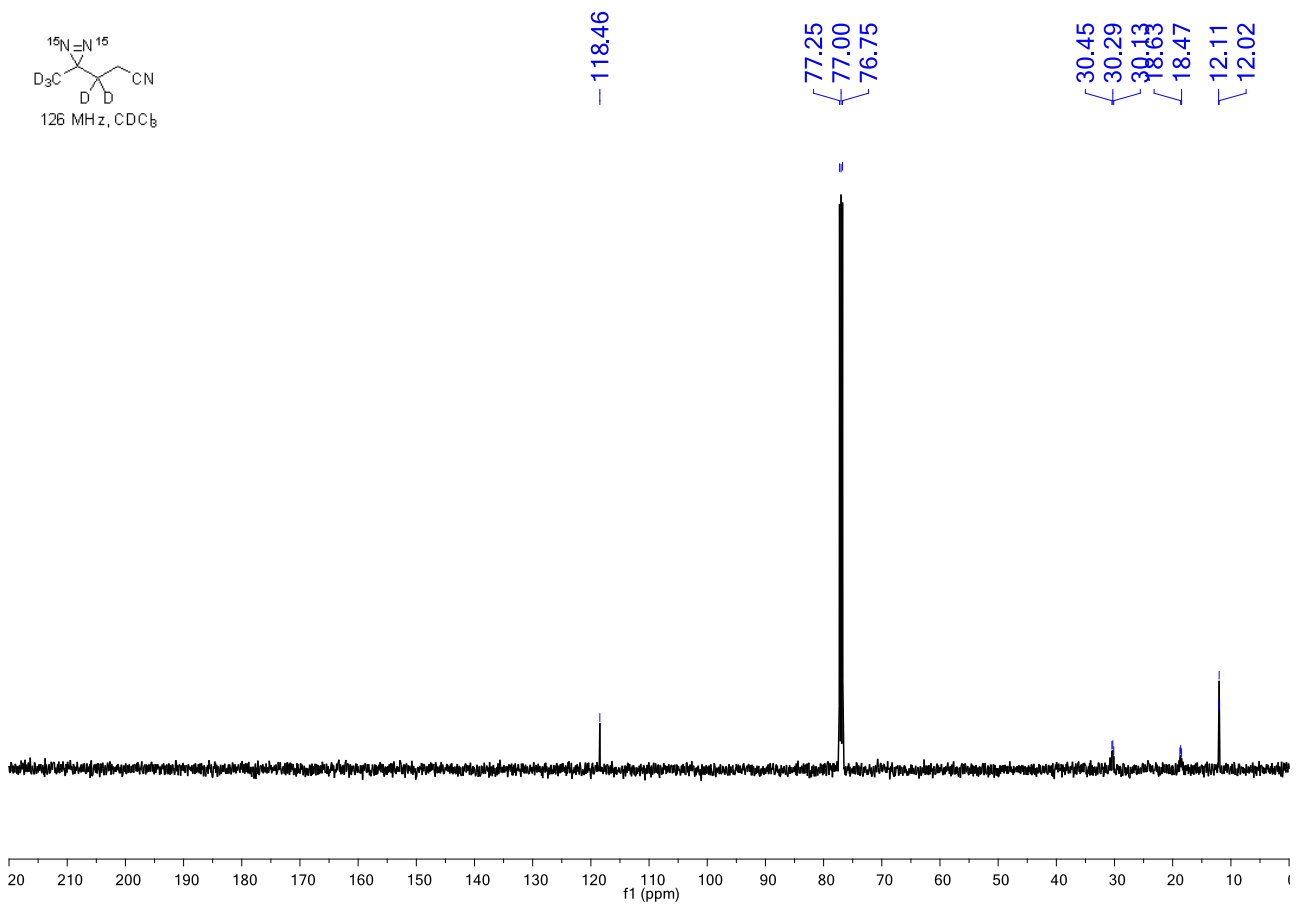

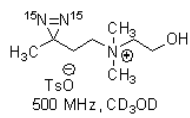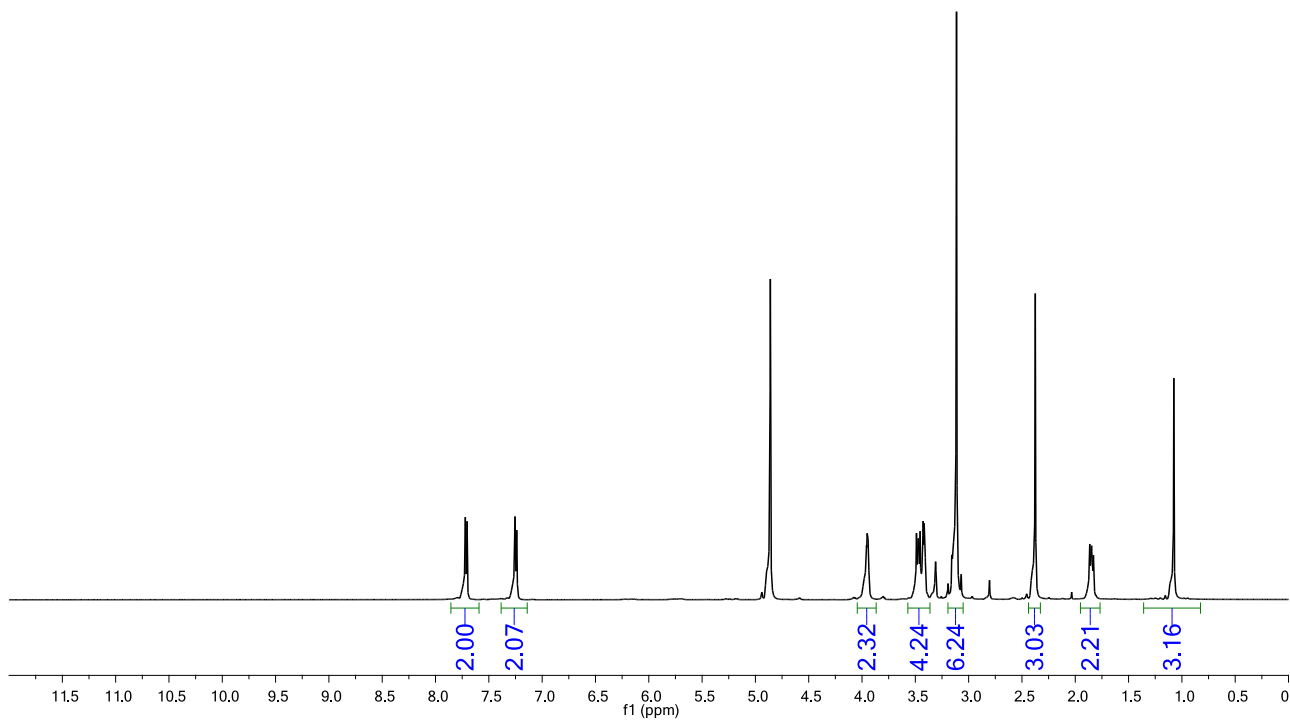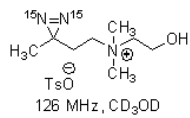

- ~ 143.63
- ~ 141.72
- ~ 129.87
- ~ 126.91
- 66.43
- ~ 56.82
- ~ 49.51
- ~ 49.17
- ~ 48.83
- ~ 48.49
- 29.27
- ~ 24.46
- ~ 24.39
- ~ 24.32
- ~ 21.31
- ~ 19.35

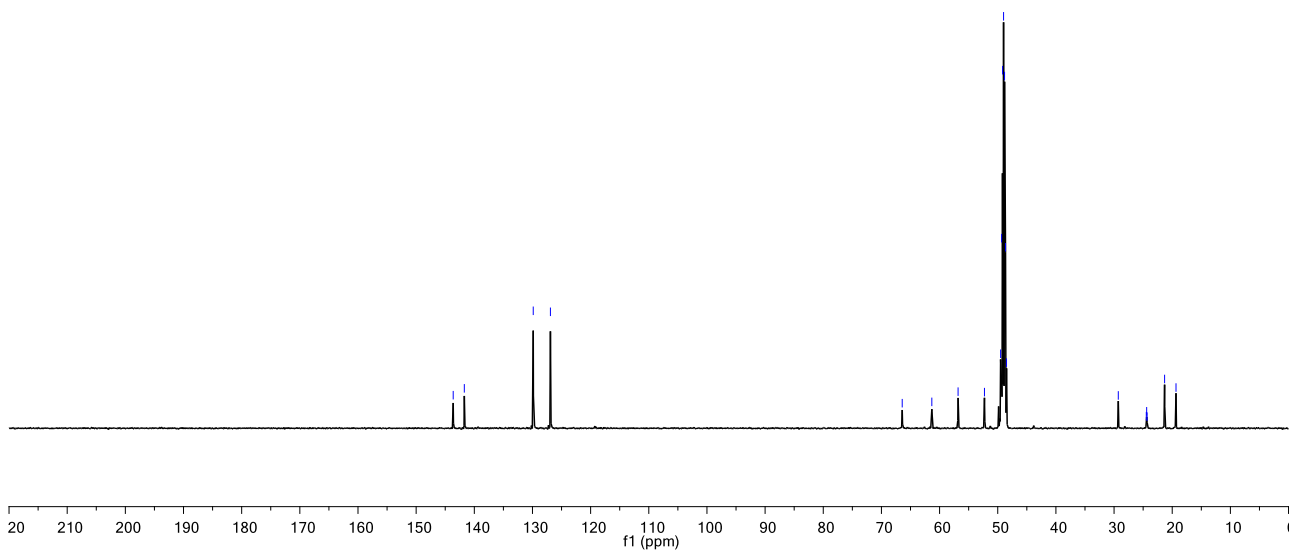

Supplement: NIHMS1698411-supplement-SI.pdf [file NIHMS1698411-supplement-SI.pdf]
